1 **Structural and functional evaluation of *de novo*-designed, two-component**  
2 **nanoparticle carriers for HIV Env trimer immunogens**

3

4 Aleksandar Antanasijevic<sup>1,2</sup>, George Ueda<sup>3</sup>, Philip JM Brouwer<sup>4</sup>, Jeffrey Copps<sup>1,2</sup>, Deli Huang<sup>5</sup>,  
5 Joel D Allen<sup>6</sup>, Christopher A Cottrell<sup>1,2</sup>, Anila Yasmeen<sup>7</sup>, Leigh M Sewall<sup>1</sup>, Ilja Bontjer<sup>4</sup>, Thomas  
6 J Ketas<sup>7</sup>, Hannah L Turner, Zachary T Berndsen<sup>1,2</sup>, Per Johan Klasse<sup>7</sup>, Max Crispin<sup>6</sup>, David  
7 Nemazee<sup>2,5</sup>, John P Moore<sup>7</sup>, Rogier W Sanders<sup>4</sup>, Neil P King<sup>3</sup>, David Baker<sup>3,8</sup>, Andrew B Ward<sup>1,2\*</sup>

8

9

10 Author affiliations:

11 1- Department of Integrative, Structural and Computational Biology, Scripps Research, La Jolla, CA 92037,  
12 USA.

13 2- International AIDS Vaccine Initiative Neutralizing Antibody Center, the Collaboration for AIDS Vaccine  
14 Discovery (CAVD) and Scripps Consortium for HIV/AIDS Vaccine Development (CHAVD), The Scripps  
15 Research Institute, La Jolla, California, USA.

16 3- Institute for Protein Design, Department of Biochemistry, University of Washington, Seattle, WA 98195,  
17 USA.

18 4- Academic Medical Center (AMC), University of Amsterdam, Amsterdam 1105AZ, Netherlands.

19 5- Department of Immunology and Microbiology, Scripps Research, La Jolla, CA 92037, USA.

20 6- School of Biological Sciences, University of Southampton, Southampton SO17 1BJ, United Kingdom.

21 7- Weill Cornell Medicine, Cornell University, New York, NY 10065, USA.

22 8- Howard Hughes Medical Institute, Chevy Chase, MD 20815, USA

23

24 \* Correspondence should be addressed to: Andrew B Ward, [andrew@scripps.edu](mailto:andrew@scripps.edu)

25

26 **Abstract**

27 Two-component, self-assembling nanoparticles represent a versatile platform for multivalent  
28 presentation of viral antigens. Nanoparticles of different sizes and geometries can be designed and  
29 combined with appropriate antigens to fit the requirements of different immunization strategies.  
30 Here, we describe detailed antigenic, structural, and functional characterization of computationally  
31 designed tetrahedral, octahedral, and icosahedral nanoparticle immunogens displaying trimeric  
32 HIV envelope glycoprotein (Env) ectodomains. Env trimers, based on subtype A (BG505) or  
33 consensus group M (ConM) sequences and engineered with SOSIP stabilizing mutations, were  
34 fused to the underlying trimeric building block of each nanoparticle. Initial screening yielded one  
35 icosahedral and two tetrahedral nanoparticle candidates, capable of presenting twenty or four  
36 copies of the Env trimer. A number of analyses, including detailed structural characterization by  
37 cryo-EM, demonstrated that the nanoparticle immunogens possessed the intended structural and  
38 antigenic properties. Comparing the humoral responses elicited by ConM-SOSIP trimers presented  
39 on a two-component tetrahedral nanoparticle to the corresponding soluble protein revealed that  
40 multivalent presentation increased the proportion of the overall antibody response directed against  
41 autologous neutralizing Ab epitopes present on the ConM-SOSIP trimers.

42

43

44

45

46 **Author Summary**

47 Protein constructs based on soluble ectodomains of HIV glycoprotein (Env) trimers are the basis  
48 of many current HIV vaccine platforms. Multivalent antigen display is one strategy applied to  
49 improve the immunogenicity of different subunit vaccine candidates. Here, we describe and  
50 comprehensively evaluate a library of *de novo* designed, protein nanoparticles of different  
51 geometries for their ability to present trimeric Env antigens. We found three nanoparticle  
52 candidates that can stably incorporate model Env trimer on their surface while maintaining its  
53 structure and antigenicity. Immunogenicity of the designed nanoparticles is assessed *in vitro* and  
54 *in vivo*. In addition to introducing a novel set of reagents for multivalent display of Env trimers,  
55 this work provides both guiding principles and a detailed experimental roadmap for the generation,  
56 characterization, and optimization of Env-presenting, self-assembling nanoparticle immunogens.

57

58

## 59 **Introduction**

60           Recombinant protein immunogens hold great promise against difficult viral and microbial  
61 targets for which there are currently no viable vaccine solutions (e.g. HIV, malaria). Well-defined  
62 structure, control over the exposure of different epitopes, high sample homogeneity and efficient  
63 manufacturing are some of the advantages of this vaccine platform (1). Engineered ectodomains  
64 of the Env glycoprotein (Env) are at the core of most present HIV vaccine development efforts (2-  
65 12). Recombinant native-like trimers, based on different HIV strains and carrying well-defined  
66 sets of stabilizing mutations, have been shown to elicit HIV-specific neutralizing antibody (NAb)  
67 responses in relevant animal models (13-16). Several of these constructs are being evaluated in  
68 human clinical trials, with many others in pre-clinical testing stages (17, 18) (ClinicalTrials.gov  
69 Identifiers: NCT03961438, NCT03816137, NCT03699241, NCT04046978).

70           While recombinant, native-like trimers represent a breakthrough in HIV vaccine  
71 development, identifying the most appropriate way to present them in order to maximize  
72 immunogenicity in different formulations is a major challenge that remains to be addressed.  
73 Interactions with elements of the innate and adaptive immune system are highly dependent on  
74 pathogen/immunogen shape and size, as well the distribution of surface antigens (1, 19, 20).  
75 Multivalent, particulate antigen presentation is important for several reasons. (1) A regular array  
76 of appropriately spaced antigens can lead to strong, avidity-enhanced interactions with B-cell  
77 receptors (BCRs), resulting in more robust activation of antigen-specific B cells (21-25). This  
78 factor is of particular importance for initial recruitment of immunologically naïve B cells with low  
79 affinity towards the antigen. (2) Multivalent presentation of glycosylated antigens such as HIV  
80 Env leads to more efficient crosslinking and opsonization by mannose-binding lectin (MBL),  
81 triggering the lectin pathway of the complement system (26, 27). The recruitment of complement

82 components facilitates recognition by antigen presenting cells (APC), enhancing uptake by  
83 dendritic cells (DC) and macrophages at the site of injection and by lymph node-resident DCs,  
84 resulting in better priming of effector T cells (28). (3) Furthermore, antigen coating by MBL and  
85 complement components leads to improved trafficking through the layer of subcapsular sinus  
86 macrophages coating the lymph node, and greater accumulation of antigen within the lymph node  
87 follicles (26, 27, 29, 30). (4) Finally, particulate antigens with diameters in the 40-100 nm range  
88 require more time to penetrate the extracellular matrix around the site of injection to reach the  
89 lymphatic system, which results in slower release and hence prolonged antigen exposure (25, 28,  
90 29, 31, 32). Extended exposure to HIV Env antigens when osmotic pumps were used for controlled  
91 immunogen release was recently correlated with more robust B-cell responses, enhanced somatic  
92 hypermutation and a greater diversity of the elicited polyclonal antibody response (33).

93 Two-component, self-assembling nanoparticles represent a versatile platform for  
94 presentation of HIV Env and other viral glycoproteins in a precisely defined manner (34-38). A  
95 combination of symmetric protein modeling and RosettaDesign (39-42) is applied to generate  
96 particles of appropriate geometry consisting of two oligomeric building blocks, at least one of  
97 which is genetically fused to the antigen (antigen-bearing component). The second component is  
98 generally based on a different oligomeric protein scaffold and is essential for assembly but it is  
99 typically not used for antigen presentation (assembly component). The two nanoparticle  
100 components can be purified independently, with assembly occurring when they are combined at  
101 an appropriate stoichiometric ratio. This strategy enables a high level of control over the structural  
102 and antigenic integrity of specific epitopes on the Env antigen (37, 38). In addition to simply  
103 achieving multivalent display, the geometry and spacing of presented antigens could also be varied  
104 through design (35, 36, 38). This may be particularly important for vaccine design efforts focusing

105 on a specific set of HIV Env epitopes, which need to be presented in an appropriate and accessible  
106 orientation.

107         Alternative methods for the multivalent presentation of HIV Env trimers include virus-like  
108 particles (43-45), liposomes (46-49); synthetic nanoparticles (50-53); and one-component  
109 nanoparticles based on natural protein scaffolds such as lumazine synthase (54, 55),  
110 dihydrolipoyltransferase (56) and ferritin (56-58). These various, complementary  
111 approaches provide additional options for immunogen design with respect to geometry and antigen  
112 distribution.

113         Recently, a library of two-component nanoparticles of different symmetries (tetrahedral,  
114 octahedral and icosahedral) was designed *de novo* to support the display of viral glycoprotein  
115 antigens, and found to stably present RSV F, HIV Env, and influenza HA trimers. (38). Here, we  
116 perform a detailed characterization of the designed HIV Env nanoparticle immunogens, based on  
117 BG505 and consensus group M (ConM) Env constructs. The capacity to appropriately present  
118 BG505-SOSIP trimers (5, 6) was assessed by testing the expression, assembly, structural and  
119 antigenic properties of the resulting nanoparticles and presented antigens. We then used rabbits to  
120 evaluate the immunogenicity of a particularly promising tetrahedral nanoparticle construct  
121 (T33\_dn2) displaying the ConM-SOSIP trimer, in comparison to the same trimers delivered as  
122 soluble proteins.

123

## 124 **Results**

### 125 **Nanoparticle Library**

126         A library consisting of five self-assembling nanoparticle candidates was designed for  
127 display of SOSIP-based trimeric ectodomains of HIV Env (38). The library includes three

128 tetrahedral (T33\_dn2, T33\_dn5 and T33\_dn10), one octahedral (O43\_dn18) and one icosahedral  
129 (I53\_dn5) system (Supplementary Figure S1.a). The tetrahedral nanoparticles present 4 Env  
130 trimers when Env is fused to one of the nanoparticle components while their octahedral and  
131 icosahedral counterparts carry 8 and 20, respectively (Supplementary Figure S1.b). In each case,  
132 the antigen-bearing component (shown in orange in Supplementary Figure S1.a) was based on one  
133 of two trimeric, helical repeat protein scaffolds – 1na0C3\_2 (38) or 1na0C3\_3 (59) – and its N-  
134 terminus was genetically fused to the C-terminus of the Env glycoprotein ectodomain. However,  
135 the amino acid sequence of each antigen-bearing component differs between the individual  
136 constructs (Supplement Table I), with the principal differences being in the residues comprising  
137 the computationally designed interface that drives assembly in the presence of the assembly  
138 component.

139

#### 140 **Antigen-bearing component production and characterization**

141 We selected a BG505-SOSIP trimer as the HIV Env model for initial optimization steps.  
142 The trimer was modified by incorporating the SOSIP.v5.2 and MD39 stabilizing mutations (3, 5).  
143 A further modification involved knocking in glycosylation sites at positions N241 and N289, to  
144 occlude the immunodominant glycan hole that is present in the BG505 trimer but generally rare in  
145 other HIV strains (16, 60). Together, these sequence changes raise the thermal stability of the  
146 trimer, increase its expression levels and may improve its ability to induce more broadly active  
147 NAbs by suppressing narrow-specificity responses (5, 61). This construct is hereafter referred to  
148 as BG505-SOSIP.v5.2(7S). Trimeric building blocks of the five nanoparticle candidates were  
149 genetically fused to the C-terminus of BG505-SOSIP.v5.2(7S) to generate the various antigen-  
150 bearing components, which were expressed as secreted proteins in 293F cells. Compared to the

151 unmodified BG505-SOSIP.v5.2(7S), all five of the engineered constructs were less efficiently  
152 expressed (Table I and Supplementary Figure S2.a). However, the four constructs that could be  
153 expressed and purified (see below) and the parental BG505-SOSIP.v5.2(7S) trimer all had very  
154 similar melting temperatures suggesting that C-terminal fusion of 1na0C3\_2/1na0C3\_3-based  
155 constructs does not destabilize the SOSIP antigen (Table I).

156 **Table I:** Properties of BG505-SOSIP-fused nanoparticle components

| Construct             | Protein yield after SEC<br>(mg per 1L of 293F cells) | T <sub>m</sub><br>(°C) | gp120 – gp41<br>cleavage | Nanoparticle<br>assembly |
|-----------------------|------------------------------------------------------|------------------------|--------------------------|--------------------------|
| BG505-SOSIP.v5.2(7S)  | 1.5 ± 0.5                                            | 76.9 ± 0.5             | Full                     | -                        |
| BG505-SOSIP-T33_dn2A  | 0.7 ± 0.2                                            | 77.9 ± 0.5             | Full                     | Yes                      |
| BG505-SOSIP-T33_dn5A  | 1.0 ± 0.2                                            | 77.2 ± 0.5             | Full                     | No                       |
| BG505-SOSIP-T33_dn10A | 0.3 ± 0.1                                            | 77.5 ± 0.5             | Full                     | Yes                      |
| BG505-SOSIP-O43_dn18B | 0                                                    | N/A                    | N/A                      | N/A                      |
| BG505-SOSIP-I53_dnB   | 0.4 ± 0.1                                            | 77.7 ± 0.5             | Full                     | Yes                      |

157  
158 Among the antigen-bearing components evaluated, BG505-SOSIP-O43\_dn18B had a high  
159 propensity towards self-aggregation, and no trimer could be recovered after purification by size-  
160 exclusion chromatography (SEC; Supplementary Figure S2.a). Although BG505-SOSIP-  
161 T33\_dn5A expressed quite efficiently, it failed to co-assemble into a nanoparticle when mixed  
162 with the corresponding assembly component, T33\_dn5B (Table I, Supplementary Figure S2.c).  
163 These constructs were therefore not pursued further. BG505-SOSIP-T33\_dn2A, -T33\_dn10A and  
164 -I53\_dn5B were expressed at ~20-50% of the BG505-SOSIP.v5.2(7S) trimer yield and efficiently  
165 assembled into nanoparticles (Table I, Supplementary Figure S2.c). The yield reductions were  
166 probably due to self-aggregation, as indicated by SEC profiles (Supplementary Figure S2.a). The  
167 absence of appropriate assembly component during expression leads to solvent exposure of  
168 nanoparticle interface residues in the antigen-bearing component that are mainly hydrophobic,  
169 which is the most probable cause of the observed self-aggregation. The above three candidates  
170 were then further characterized. An SDS-PAGE analysis showed that the SEC-purified samples



171 were homogeneous and cleaved into gp120 and gp41 (+ nanoparticle component) subunits that  
172 were separated when a reducing agent was added to break the engineered disulfide bonds (Figure  
173 1.a). Analysis of 2D class-averages from negative stain electron microscopy (NS-EM) imaging  
174 suggests that the BG505-SOSIP trimer components are in a native-like conformation, with the  
175 density corresponding to the fused nanoparticle component clearly discernible (Figure 1.b; see red  
176 arrows). A low level (~ 8 %) of monomeric protein was present only in the BG505-SOSIP-  
177 T33\_dn10A sample.

178 We used Biolayer Interferometry (BLI) and a panel of antibodies (IgG) specific to different  
179 Env epitopes and conformations to probe the antigenicity of the antigen-bearing components in  
180 their trimeric forms, prior to nanoparticle assembly (Figure 1.c). All the samples interacted with  
181 neutralizing antibodies (NAbs) specific to the closed, prefusion state of the BG505-SOSIP trimer  
182 (VRC34, PGT145, PGT151, 2G12, 3BC315), but did not bind to b6 and 14e, two non-neutralizing  
183 antibodies (non-NAbs) that recognize more open trimer conformations and free monomers. The  
184 RM19R and RM20A3 antibodies showed markedly lower binding to the BG505-SOSIP-  
185 T33\_dn10A and -I53\_dn5B components compared to the BG505-SOSIP.v5.2(7S) trimer. These  
186 two non-NAbs interact with the base of the BG505-SOSIP.v5.2(7S) trimer, which is the site of  
187 fusion to nanoparticle component. The occlusion of these epitopes on the antigen-bearing fusion  
188 constructs is expected and potentially useful, as the induction of non-NAbs against the trimer base  
189 could be immune-distractive. Surprisingly, BG505-SOSIP-T33\_dn2A displayed no change in  
190 RM19R binding compared to free BG505-SOSIP.v5.2(7S), and only a marginal decrease in  
191 binding to RM20A3.

192 In a glycan composition analysis, the ratio of oligomannose and complex glycans was very  
193 similar for BG505-SOSIP-T33\_dn2A, -T33\_dn10A, -I53\_dn5B and the parent BG505-

194 SOSIP.v5.2(7S) trimer, with the oligomannose proportion ranging from 50% to 57% (Figure 1.d).  
195 The ratio of individual oligomannose species remains similar in all samples with the highest  
196 difference being present in BG505-SOSIP-T33\_dn2A, where the relative content of oligomannose  
197 species of higher molecular weight (M8 and M9) is slightly elevated.

198 A site-specific glycan composition analysis showed that glycan processing was conserved  
199 at key epitopes on all the trimer samples, with sites such as N332 and N160 containing  
200 predominantly oligomannose-type glycans (Supplementary Figure S3.). One major difference was,  
201 however, visible at gp41-site N637 on BG505-SOSIP-T33\_dn2A, which contains 100%  
202 oligomannose-type glycans compared to 34% on BG505-SOSIP.v5.2(7S). Additionally, this site  
203 is fully glycosylated in the three antigen-bearing components, and only partially glycosylated  
204 (56%) on the BG505-SOSIP.v5.2(7S) trimer. Glycan sites on gp120 located at the protomer  
205 interfaces of the BG505-SOSIP-T33\_dn2A and -T33\_dn10A components were also enriched for  
206 oligomannose-type glycans, most notably N276 and N355. Specifically, the oligomannose  
207 contents of 67% for N276 and 22% for N355 on BG505-SOSIP.v5.2(7S) increased to >95% for  
208 N276 and >75% for N355 on the BG505-SOSIP-T33\_dn2A and -T33\_dn10A components. The  
209 V1/V2 glycan sites N133, N137 and N185e were <95% occupied on all the trimer constructs, while  
210 the N156 site on BG505-SOSIP.v5.2(7S) was 89% occupied. Among the closely spaced  
211 glycosylation sites at N289, N295 and N301, N289 and to a lesser extent N301 glycosylation  
212 appear to be affected by the fusion to the antigen-bearing component of the nanoparticle. A  
213 reduction of 13-19% was observed in the occupancy at N289 site in the three tested antigen-bearing  
214 components when compared to the parental BG505-SOSIP.v5.2(7S).

215 Collectively, these data indicate that several of the de novo-designed nanoparticle trimers  
216 were able to present a genetically fused native-like Env trimer without major changes to antigen  
217 structure, stability, or glycan profile.

218

### 219 **Nanoparticle assembly, antigenic and structural characterization**

220 The three antigen-bearing components described above (BG505-SOSIP-T33\_dn2A, -  
221 T33\_dn10A and -I53\_dn5B) were then tested for nanoparticle assembly (Figure 2.a). The  
222 corresponding assembly components, T33\_dn2B, T33\_dn10B and I53\_dn5A required for  
223 nanoparticle formation were expressed in *E. coli* and purified as described in the Methods section.  
224 Analysis of the purified assembly components by SDS-PAGE is shown in Supplementary Figure  
225 S2.b. Equimolar amounts of the antigen-bearing component and the corresponding assembly  
226 component (on a subunit:subunit basis) were combined and incubated for 24 hours at three  
227 different temperatures (4, 25 and 37 °C) before assembly was evaluated using native PAGE. In  
228 each case, assembly efficiency increased with the incubation temperature. The tetrahedral  
229 nanoparticles, T33\_dn2 and T33\_dn10, assembled at a high yield (~80-100%) under all the  
230 conditions tested. However, the icosahedral nanoparticle, I53\_dn5, assembled less efficiently.  
231 After a 24-hour incubation at 37 °C, only ~30% of the input material migrated as nanoparticles on  
232 a native gel, though when the incubation period was extended to 72 h at 37 °C, the yield increased  
233 to ~70% (Supplementary Figure S2.c).

234 The presence of both the antigen-bearing component and the assembly component in SEC-  
235 purified nanoparticles was verified using SDS-PAGE (Supplementary Figure S2.d). Sample  
236 homogeneity and structural integrity were assessed using NS-EM. Representative raw  
237 micrographs, 2D class-averages and reconstructed 3D models (adapted from (38)) show that the

238 assembled forms of the nanoparticles were consistent with the predictions of the computational  
239 design models, with individual building blocks clearly discernible in each case (Figure 2.b).

240 Nanoparticle stability under various conditions was evaluated using a native PAGE assay  
241 (Supplementary Figure S4.). The tetrahedral particles (T33\_dn2 and T33\_dn10) were highly stable  
242 in buffers with pH values in the range 5–9 and at NaCl concentrations from 25–1000 mM. They  
243 also remained assembled at temperatures up to 65 °C and withstood multiple freeze-thaw cycles.  
244 In contrast, the icosahedral nanoparticles were less stable under the various test conditions and  
245 were particularly sensitive to the freeze-thaw procedure. The latter observations are consistent with  
246 the presence of significant amounts of unassembled components revealed by NS-EM (Figure 2.b,  
247 right), and also with the greater difficulties in assembling the icosahedral particles (see above).

248 We used BLI to assess whether nanoparticle presentation interfered with the accessibility  
249 of antibody epitopes, compared to the parental BG505-SOSIP.v5.2(7S) trimer (Figure 2.c).  
250 Overall, the antigenic profiles of the assembled nanoparticles, the corresponding antigen-bearing  
251 components and the free trimer were very similar (Figure 2.c, and see also Figure 1.c). Compared  
252 to the BG505-SOSIP.v5.2(7S), the greatest decrease in binding was seen with the base-specific  
253 antibodies, RM19R and RM20A3, suggesting that nanoparticle assembly further decreases the  
254 accessibility of the trimer base (Figure 2.c). There was also a decrease in the binding of the BG505-  
255 SOSIP-T33\_dn2 nanoparticles to the 3BC315 broadly neutralizing antibody (bNAb), compared to  
256 the free trimer (Figure 2.c). As no such difference was seen with the BG505-SOSIP-T33\_dn2A  
257 antigen-bearing component (Figure 1.c), assembly of this nanoparticle appears to reduce the  
258 accessibility of epitopes for bNAbs such as 3BC315 that are located near the bottom of the trimer.

259

260 **Cryo-EM analysis of assembled nanoparticles**

261 We used cryo-electron microscopy (cryo-EM) to obtain more detailed information on the  
262 structures of the BG505-SOSIP-T33\_dn10 and -I53\_dn5 nanoparticles and the Env trimers they  
263 display (Figure 3.). The data were processed as described in the Methods section and summarized  
264 in Supplementary Figures S5 and S6, with data acquisition and processing statistics shown in  
265 Supplementary Table II. Due to the flexible nature of the linker between the nanoparticle  
266 component and the BG505-SOSIP trimer, the initial 3D reconstructions of the complete  
267 nanoparticles generated only highly diffuse and poorly defined density for BG505-SOSIP (Figure  
268 3. and Supplementary Figure S5. and S6.). The data were therefore computationally segmented to  
269 reconstruct the nanoparticle core and the displayed trimer as two independent but flexibly linked  
270 entities (sub-particles).

271 Nanoparticle reconstruction was performed using a focused refinement procedure in which  
272 a solvent mask around the nanoparticle core excluded the signal originating from BG505-SOSIP  
273 trimers. Symmetry was applied in all 3D classification and refinement steps: tetrahedral for  
274 T33\_dn10 and icosahedral for I53\_dn5. The final resolutions of the reconstructed maps were 4.25  
275 Å and 12.50 Å for T33\_dn10 and I53\_dn5, respectively. The T33\_dn10 core design model from  
276 Rosetta Design was relaxed into the EM map using a combination of Rosetta relaxed refinement  
277 (62) and manual refinement in Coot (63). Model refinement statistics are shown in Supplementary  
278 Table III. The model-to-map fit for the refined structure is shown in Figure 3.a (right). There are  
279 only small, local structural differences between the Rosetta-predicted, unliganded (38) and  
280 BG505-SOSIP-bearing models of the T33\_dn10 -nanoparticle core. The C $\alpha$  RMSD between the  
281 experimentally determined and predicted models is 1.43 Å (on the level of the asymmetric unit),  
282 demonstrating that the presence of four displayed BG505-SOSIP trimers did not cause any major  
283 structural rearrangements within the nanoparticle core. Model refinement was not performed for

284 the I53\_dn5 core because the resolution was too poor. The design model of I53\_dn5 was, however,  
285 highly concordant with the reconstructed EM map (Figure 3.b, right).

286 The nanoparticle-displayed BG505-SOSIP trimers were reconstructed using a localized  
287 reconstruction approach (64). The signal corresponding to the nanoparticle core was subtracted  
288 from the particle images and the trimer sub-particles were extracted and aligned independently.  
289 The final BG505-SOSIP trimer subset from the T33\_dn10 nanoparticle dataset consisted of 84,435  
290 sub-particles and was reconstructed to 4.14 Å resolution. A model of the displayed BG505-SOSIP  
291 was refined using a combination of Rosetta-relaxed and manual refinement in Coot (Figure 3.a,  
292 Supplementary Table III). The close agreement of the refined model with published structures of  
293 the BG505-SOSIP trimer (PDB entries: 5CEZ and 5ACO (65, 66)) implies that nanoparticle  
294 assembly does not interfere with the structural integrity of the trimer. For the I53\_dn5 nanoparticle  
295 dataset, the final subset included 7,737 sub-particles and was reconstructed to a resolution of 6.67  
296 Å. The quality of the BG505-SOSIP map was significantly better than the corresponding I53\_dn5  
297 nanoparticle core but still too poor resolution to refine a structural model. However, a published  
298 structure (PDB entry: 5CEZ (65)) was docked into the map and exhibited a good fit (Figure 3.b).

299

### 300 **Nanoparticle presentation affects trimer interaction with B cells and immunogenicity**

301 BG505-SOSIP-T33\_dn2, -T33\_dn10, and -I53\_dn5 nanoparticles were then functionally  
302 analyzed as immunogens. Their capacity to stimulate antigen-specific B cells was evaluated using  
303 K46 mouse B-cell lines that expressed IgM versions of three different HIV-specific bNAbs on  
304 their surfaces (PGT145, VRC01 and PGT121; Figure 4.). The B cells were treated with equimolar  
305 amounts of BG505-SOSIP.v5.2(7S) antigen presented as free trimers, antigen-bearing components  
306 or assembled nanoparticles, and the relative number of cells responding to each antigen was

307 quantified (Figure 4.).  $\text{Ca}^{2+}$  mobilization inside B cells, measured by fluorescence-activated cell  
308 sorting (FACS), was used as an indicator of antigen-induced activation. For clarity, the data from  
309 each B cell line are presented in two panels, the first showing the different antigen-bearing trimeric  
310 components, and the second the assembled nanoparticles. The free trimers (unmodified BG505-  
311 SOSIP.v5.2(7S) and the antigen-bearing components) induced only very low levels of  $\text{Ca}^{2+}$  flux  
312 (Figure 4., top) suggesting that the local antigen concentration was insufficient for efficient BCR  
313 crosslinking and B-cell activation (67). In contrast, presenting the same trimers on the surface of  
314 each of the three nanoparticles activated the B cells much more strongly, as quantified by the  
315 higher percentage of cells in which a  $\text{Ca}^{2+}$  flux occurred (Figure 4., bottom). The icosahedral  
316 BG505-SOSIP-I53\_dn5 nanoparticle triggered stronger  $\text{Ca}^{2+}$  signal than the two tetrahedral  
317 nanoparticles in B cells expressing PGT145. In VRC01-expressing cells this difference was less  
318 pronounced, particularly when compared to BG505-SOSIP-T33\_dn10. Although the signal-to-  
319 noise ratio was generally low in PGT121-expressing cells, there was an increased  $\text{Ca}^{2+}$  flux  
320 response with the nanoparticles compared to free trimers.

321         Based on the totality of the production, antigenicity and biophysical data, we determined  
322 the tetrahedral T33\_dn2 nanoparticle to be the best system for displaying the BG505-SOSIP  
323 trimer. We then assessed whether this nanoparticle design could also be used to present SOSIP  
324 trimers based on another HIV Env sequence, specifically consensus group M (ConM) (8). The  
325 ConM-SOSIP trimers are being evaluated clinically (ClinicalTrials.gov Identifiers:  
326 NCT03961438, NCT03816137) and have been studied in the context of the designed, two-  
327 component nanoparticle, I53-50 (37). The ConM-SOSIP construct used in the experiments, termed  
328 ConM-SOSIP.v7, was engineered to include the SOSIP.v5.2 and TD8 stabilizing mutations (see  
329 the Method section and Supplementary Table I for sequence information) (8, 37, 68). The trimeric

330 ConM-SOSIP-T33\_dn2A component expressed at a similar level as its BG505-based counterpart  
331 (~ 0.6 mg per 1 L of 293F cells after SEC, Supplementary Figure S7.a), and was assembled  
332 efficiently into nanoparticles when incubated with equimolar amounts of the T33\_dn2B  
333 component at 4 °C (> 90% assembly after 24 h, Supplementary Figure S7.b). The purified ConM-  
334 SOSIP-presenting nanoparticles were characterized by NS-EM and Surface Plasmon Resonance  
335 (SPR) (Supplementary Figure S7.b and c). The NS-EM analysis showed that the ConM-SOSIP-  
336 T33\_dn2 nanoparticles assembled to the target tetrahedral architecture and were highly  
337 homogeneous. Assessed by SPR, the ConM-SOSIP.v7 trimers on their surfaces retained the  
338 capacity to interact with trimer-specific antibodies. An antigenicity comparison with equimolar  
339 amounts of the free ConM-SOSIP.v7 trimer suggested that the nanoparticles efficiently presented  
340 NAb epitopes located on the upper half of the trimer but that the accessibility of epitopes located  
341 towards the bottom of the trimer (i.e. the fusion peptide, 35O22 and 3BC315 epitopes) was  
342 partially impaired. This data is consistent with the similar SPR-based epitope accessibility studies  
343 performed on T33\_dn2 nanoparticles presenting BG505-SOSIP.v5.2(7S) (38).

344 The ConM-SOSIP-T33\_dn2 nanoparticles were then tested for immunogenicity in New  
345 Zealand White Rabbits and compared to the soluble ConM-SOSIP.v7 trimer (Figure 5.). Two  
346 groups of 5 rabbits were used, with the immunogen dose adjusted to ensure that all the animals  
347 received an equimolar amount of ConM-SOSIP.v7 trimer (30 µg). The rabbits were immunized at  
348 weeks 0, 4 and 20, with blood draws performed at weeks 0, 2, 4, 6, 8, 12, 16, 20 and 22. Immune  
349 responses were monitored in sera by measuring ConM-SOSIP trimer-specific antibody titers, by  
350 ELISA, and NAb titers using the TZM-bl cell assay.

351 Both immunogens induced anti-ConM-SOSIP binding antibodies (Figure 5. middle  
352 panels). The mean ELISA binding titers were comparable between the immunization groups at



353 each time point. An area under the curve (AUC) statistical analysis using a two-tailed Mann-  
354 Whitney U-test generated a p-value of 0.69, implying that there is no statistically significant  
355 difference in the binding titers between the two groups across all time points. Antibody responses  
356 of similar magnitude (week-22 ELISA titers of  $\sim 10^5$ ) against the nanoparticle core were also  
357 detected in the ConM-SOSIP-T33\_dn2 immunogen group but not the soluble trimer group  
358 (Supplementary Figure S8.a).

359 NAb titers against the autologous Tier-1 ConM virus were more variable than the binding  
360 antibody responses, both within and between the immunization groups (Figure 5, bottom panels).  
361 Within each group, the NAb titers spanned a range of  $\sim 100$ -fold at each time point, a greater  
362 variation than the  $\sim 10$ -fold range in the anti-trimer titers. Every rabbit immunized with ConM-  
363 SOSIP-T33\_dn2 nanoparticles generated a detectable NAb response (titer  $>20$ ) after the first  
364 immunization, and the mean titers were consistently higher in this group than in the ConM-  
365 SOSIP.v7 group ( $p = 0.016$  by AUC analysis) (Supplementary Figure S8.b). Taken together, the  
366 serological data suggest that presenting the ConM-SOSIP.v7 trimer on the T33\_dn2 nanoparticle  
367 increased the proportion of the B-cell response directed against the autologous NAb epitope(s).

368 We next employed EM-based polyclonal epitope mapping (EMPEM) (69) to characterize  
369 the specificities of antibodies elicited by the two immunogens (Figure 6). Polyclonal Fab samples  
370 were prepared from week-22 sera from the two animals in each group with the highest ConM NAb  
371 titers (Group 1, r2381 and r2382; Group 2, r2383 and r2385), and also from the same animals at  
372 week 4. The purified Fabs were complexed with ConM-SOSIP.v9 trimers, which contain  
373 additional stabilizing mutations (see Methods and Supplementary Figure S9. a and b). Raw data,  
374 sample micrographs, 2D class averages and reconstructed 3D maps of the trimer-Fab complexes  
375 are shown in Supplementary Figure S10. Composite figures based on these datasets are shown in

376 Figure 6, where polyclonal Fabs of the various specificities detected by the 3D analysis are docked  
377 onto a reference SOSIP trimer model. Fab epitopes are defined based on the partial overlap with  
378 the receptor binding site (CD4bs), variable loops (e.g., V1, V2, V3 and their combinations) and,  
379 in some cases, overlap with one or more glycan sites (e.g., N611, N618/N625 and N355/N289).  
380 For reference, binding and neutralizing antibody titers are also shown for each of the four animals  
381 at the two time-points.

382 On a qualitative level, the data indicate that the immunogenic properties of the ConM-  
383 SOSIP.v7 trimer were not influenced by how it was presented. This inference is particularly true  
384 at week 22 (2 weeks after the final boost) where similar antibody specificities were detected in all  
385 4 four rabbits, notably ones targeting the V1/V2/V3 interface, the N618/N625 and N355/N289  
386 glycan epitopes and the trimer base. The N611 glycan epitope was also targeted in three animals  
387 (r2383 was the exception), while CD4bs-associated responses were detected in one animal from  
388 each group (r2381 and r2385). The CD4bs is a well-characterized bNAb target that is the focus of  
389 several vaccine design strategies (54, 70). We were unable to identify any relationship between  
390 the type and quantity of the antibody specificities induced and the binding and NAb responses  
391 present in the corresponding sera at the week-22 time point.

392 There was more variability in the antibody specificities detected at week 4. The N618/N625  
393 and N355/N289 glycan epitopes were targeted in all 4 animals, while anti-base antibodies were  
394 induced in both animals from the soluble trimer group and in animal r2383 from the nanoparticle  
395 group. Antibodies to the N611 glycan site were detected in one animal from each group. However,  
396 antibodies against the V1/V2/V3 interface, located at the top of the trimer, were visible only in the  
397 nanoparticle immunogen group at this early time point. The initial antibody response induced after  
398 a single immunization (i.e., at week 4) may be skewed towards the V1/V2/V3 epitopes at the trimer

399 apex and away from the trimer base in the nanoparticle immunization group, compared to the  
400 soluble trimer group. The early differences in how the antibody responses are primed may  
401 contribute to the higher neutralization titers induced in the nanoparticle group after three  
402 immunizations (i.e., by week 22).

403

## 404 **Discussion**

405 We evaluated the structure, stability, antigenicity and immunogenicity of two-component  
406 nanoparticles presenting HIV Env trimers. In contrast to previous work, the nanoparticles were  
407 designed *de novo* to comprise a trimeric building block tailored to support C-terminal fusion to  
408 HIV Env and other trimeric viral antigens (38). Our library consisted of five nanoparticle  
409 candidates of different geometries: three tetrahedral, one octahedral and one icosahedral,  
410 presenting 4, 8 and 20 Env trimers, respectively. Two tetrahedral (T33\_dn2 and T33\_dn10) and  
411 one icosahedral nanoparticle (I53\_dn5) were able to support the presentation of BG505-  
412 SOSIP.v5.2(7S), the model Env trimer selected for optimization. Biophysical and antigenic  
413 characterization of the nanoparticle-presented trimers showed that they were folded appropriately,  
414 with no detectable adverse effects of nanoparticle incorporation. The nanoparticle-displayed  
415 trimers were also glycosylated comparably to their soluble counterparts (18, 71). However,  
416 nanoparticle presentation did reduce the accessibility of epitopes on and proximal to the trimer  
417 base, which is consistent with antibody binding analyses of other self-assembling nanoparticle  
418 designs (37, 38).

419 The tetrahedral nanoparticles (T33\_dn2 and T33\_dn10) are the lowest valency nanoparticle  
420 systems developed for presentation of Env trimer immunogens. Both assembled efficiently and  
421 were highly stable under a range of stress-inducing conditions in vitro. They were also superior to

422 soluble trimers when tested in Ca<sup>2+</sup> flux-based assays of B-cell stimulation. This finding implies  
423 that that as few as four BG505-SOSIP antigens are sufficient to meet the minimum threshold for  
424 activation when B-cell receptors have high affinity for the antigen (Figure 4.). Of note is that the  
425 BG505- and ConM-SOSIP-T33\_dn2 nanoparticles can be produced at high yield; soluble trimers  
426 based on these two genotypes are currently being evaluated for safety and immunogenicity in  
427 human clinical trials (ClinicalTrials.gov Identifiers: NCT03961438, NCT03816137,  
428 NCT03699241).

429         The observed issues with assembly and stability of the icosahedral BG505-SOSIP-I53\_dn5  
430 nanoparticles are somewhat unexpected given that these particles assemble very efficiently when  
431 Env is not present (assembly completes within ~30 minutes) and when other antigens (i.e.,  
432 influenza HA and prefusion RSV F) are displayed by genetic fusion (38). The instability is most  
433 likely caused by the crowding of heavily glycosylated Env trimers on the surface of I53\_dn5.  
434 Additionally, excessive steric clashes could lead to the formation of partially assembled particles  
435 that are difficult to distinguish and purify away from the fully assembled ones. It is possible that  
436 partially assembled particles constitute the majority of the sample following purification, and that  
437 these were unable to withstand the stresses to which they were subjected. Designing nanoparticles  
438 with larger diameters to decrease the antigen crowding effect while maintaining the appropriate  
439 spacing necessary for multivalent interactions with B cells may help achieve more optimal  
440 properties with the higher valency particles.

441         We used rabbits to compare the immunogenicity of the tetrahedral ConM-SOSIP T33\_dn2  
442 nanoparticles and the corresponding soluble ConM-SOSIP.v7 trimers (Figures 5 and 6). The anti-  
443 trimer binding antibody responses were similar in the two groups, but the autologous NAb titers  
444 were higher in the nanoparticle recipients. Polyclonal epitope mapping suggested that this could

445 be due to better shielding of epitopes that are targets for non-neutralizing antibodies (e.g. the trimer  
446 base) and/or more efficient priming of antibodies targeting the variable loops located on the top of  
447 the ConM trimer (V1/V2/V3). This is supported by the earlier immunogenicity studies performed  
448 with ConM-based immunogens that identified variable loops at the ConM apex (V2 and V3) as  
449 the most dominant neutralizing epitopes (8, 37). Furthermore, a meta-analysis of multiple  
450 nanoparticle immunization experiments shows that the greatest benefit, compared to soluble  
451 trimers, arises when the NAb epitopes are located near the trimer apex (19). Our data supports this  
452 conclusion and suggests that immunization platforms based on apex-targeting Env immunogens  
453 may benefit from nanoparticle display. Importantly, however, the immunogenicity data confirms  
454 that non-apex epitopes are also accessible and that T33\_dn2-presented Env trimers are capable of  
455 eliciting antibodies against the same epitopes as free trimers. This provides a rationale for using  
456 tetrahedral nanoparticles with a wide range of epitope-focused HIV vaccine design approaches.

457         The anti-base response seen in the nanoparticle group was unexpected; it most likely arises  
458 from partial nanoparticle disassembly *in vivo*, a supposition supported by the relatively steep angle  
459 with which these antibodies approach the trimer. More studies are required to understand the  
460 processes that induce nanoparticle disassembly, the kinetics of this process and the impact on  
461 trimer immunogenicity.

462         Overall, our data confirms the ability of designed two-component nanoparticles to at least  
463 moderately improve the immunogenicity of HIV Env antigens and provides *in vitro* and *in vivo*  
464 evidence of the potential benefits of these systems. Additionally, we introduce and validate two  
465 tetrahedral nanoparticle platforms that can be used as immunogens as well as tools for basic  
466 structural and immunological experiments. The screening, biophysical and structural

467 characterization approach that we describe provides a roadmap for generating and evaluating  
468 multivalent Env trimer immunogens based on two-component self-assembling scaffolds.

469

## 470 **Materials and Methods**

471 - **DNA vectors and cloning.** Constructs containing BG505-SOSIP.v5.2(7S) or ConM-SOSIP.v7  
472 genes codon-optimized for mammalian cell expression were subcloned into a pPPI4 vector.  
473 BamHI and NheI restriction sites were used for insertion of different C-terminal nanoparticle  
474 assembly components. Restriction enzymes (BamHI-HF and NheI-HF) and Quick Ligation kit  
475 were purchased from New England Biolabs (NEB). Linker insertion and modifications in the  
476 antigen-bearing components were achieved using Q5 Site Directed Mutagenesis Kit (NEB).  
477 Custom DNA primers produced by Integrated DNA technologies (IDT). Assembly component  
478 DNA constructs, codon optimized for bacterial expression were subcloned into a pET28b (+)  
479 vector. Protein sequences of all constructs used in this study are shown in Supplement Table I.

480 - **Expression and purification of BG505-SOSIP, ConM-SOSIP and antigen-bearing**  
481 **components.** BG505-SOSIP construct used in this study was engineered to carry a combination  
482 of SOSIP.v5.2 (mutations: A501C, T605C, I559P, E64K, A73C, A316W, A561C) (5) and MD39  
483 (mutations: M271I, A319Y, R585H, L568D, V570H, R304V, F519S) (3) stabilizing mutations  
484 and glycan knock-ins at positions 241 (mutations: P240T, S241N) and 289 (mutations: F288L,  
485 T290E, P291S). ConM-SOSIP.v7 construct had SOSIP.v5.2 and TD8 stabilizing mutations (8,  
486 68). ConM-SOSIP.v9 construct was engineered with SOSIP.v6 (5), MD39 (3) and TD8 (68)  
487 stabilizing mutations. For sequence information on ConM-SOSIP constructs see Supplementary  
488 Table I and Supplementary Figure S9.b. pPPI4 DNA vectors carrying free SOSIP trimers or  
489 SOSIP-based antigen-bearing components were transfected into FreeStyle 293F cells using

490 polyethyleneimine (Polysciences, Inc) as described previously(6). 6 days post transfection the cells  
491 were spun down (7,000 RPM for 1 hour at 4 °C) and the supernatant was cleared by vacuum  
492 filtration (0.45 µm filtration units, Millipore Sigma). Antigen-bearing components were purified  
493 using immuno-affinity column with immobilized PGT145 IgG (Sephacrose 4B resin, GE  
494 Healthcare Life Sciences). 3 M MgCl<sub>2</sub> + 250 mM l-arginine (pH 7.2) buffer was applied for protein  
495 elution. Eluate was collected into an equal volume of the SEC buffer (25 mM Tris + 500 mM NaCl  
496 + 250 mM l-arginine + 5 % glycerol, pH 7.4). Affinity-purified protein was concentrated and  
497 buffer exchanged to SEC buffer using Amicon ultrafiltration units, 100 kDa cutoff (Millipore  
498 Sigma). Size exclusion chromatography was used as a final purification step (HiLoad 16/600  
499 Superdex S200 pg column). Purified proteins were stored at 4 °C.

500 - **Assembly component expression and purification.** E coli expression system was used for  
501 assembly component production (T33\_dn2B, T33\_dn10B and I53\_dn5A). BL21-DE3 cells (NEB)  
502 were transformed with pET28b (+) vector carrying the appropriate gene with a C-terminal His-  
503 tag. Following inoculation at 37 °C, the cells were incubated in self-inducible media (38) for 18  
504 hours (shaking at 220 RPM, 16 °C). Centrifugation (3000 RPM, 30 min, 4 °C) was used to harvest  
505 the cells. Subsequently the cells were resuspended in TBS buffer (25 mM Tris + 2.7 mM KCl +  
506 137 mM NaCl, pH 7.4; Alfa Aesar / Thermo Fisher Scientific, Cat # J60764) containing cComplete  
507 protease inhibitor cocktail (Sigma Millipore) and lysed using sonication and pressurized cell  
508 disruption. Cell lysate was cleared by centrifugation at 12000 RPM for 1 hour at 4 °C. cComplete  
509 His-Tag Purification Resin (Sigma Millipore) was applied for affinity purification. An additional  
510 wash step with 100 ml of detergent-containing buffer (25 mM Tris + 500 mM NaCl + 0.5 % N-  
511 Dodecyl-β-D-maltoside, pH 7.4) was introduced to remove endotoxin from the samples used for  
512 immunogen preparation. Samples were eluted using high imidazole buffer (25 mM Tris + 500 mM

513 NaCl + 500 mM imidazole, pH 7.4). Proteins were then concentrated and buffer-exchanged to  
514 SEC buffer (25 mM Tris + 500 mM NaCl + 250 mM l-arginine + 5 % glycerol, pH 7.4) using  
515 Amicon ultrafiltration units, 10 kDa cutoff (Millipore Sigma). HiLoad 16/600 Superdex S200 pg  
516 column was used for final size exclusion purification step.

517 - **Nanoparticle assembly studies.** Three assembly reactions containing 5  $\mu$ g of appropriate  
518 antigen-bearing component and equimolar amounts of corresponding assembly component were  
519 incubated at different temperatures (4, 25 and 37 °C) for 24 hours. Samples were run on  
520 NativePAGE 3-12% BisTris Protein Gels using the dark blue cathode protocol for the  
521 NativePAGE™ Novex® Bis-Tris Gel system (Thermo Fisher Scientific). Gels were fixed, de-  
522 stained as recommended by the protocol and imaged.

523 - **Differential Scanning Fluorimetry.** Measurements were performed on a Prometheus NT.48  
524 NanoDSF instrument (NanoTemper Technologies) as described previously (72). Protein and  
525 nanoparticle samples were diluted to 0.5 mg/ml in the SEC buffer and loaded into NanoDSF  
526 capillaries (in triplicates).  $T_m$  measurement range was 20 – 95 °C at a rate of 1 °C/min. The first  
527 derivative curve was calculated from the raw data using the instrument software and the location  
528 of the maximum recorded as the  $T_m$  value.

529 - **Negative stain electron microscopy.** Negative stain electron microscopy experiments were  
530 performed as described previously (72, 73). Free nanoparticle components and purified  
531 nanoparticles were diluted to 20-50  $\mu$ g/ml and loaded onto the carbon-coated 400-mesh Cu grid  
532 (glow-discharged at 15 mA for 25 s) for 10 s. After the sample was blotted off the grids were  
533 negatively stained with 2 % (w/v) uranyl-formate for 60 s. Data was collected on a Tecnai Spirit  
534 electron microscope, operating at 120 keV. Nominal magnification was set to 52,000 X with a  
535 pixel size of 2.05 Å at the specimen plane. Electron dose was adjusted to 25 e-/Å<sup>2</sup> and the defocus



536 was set at  $-1.50\ \mu\text{m}$ . All micrographs were recorded on a Tietz 4k x 4k TemCam-F416 CMOS  
537 camera using Leginon automated imaging interface. Initial data processing was performed using  
538 the Appion data processing suite. For nanoparticle samples, approximately  $\sim 1,000$  particles were  
539 manually picked from the micrographs and 2D-classified using the Iterative MSA/MRA algorithm.  
540 For antigen-bearing components components and other trimer samples, 20,000 – 40,000 particles  
541 were auto-picked and 2D-classified using the Iterative MSA/MRA algorithm. For 3D classification  
542 and refinement, processing was continued in Relion/3.0 (74). Maps were segmented and color-  
543 coded in UCSF Chimera 1.13 (75).

544 - **Cryo-EM grid preparation.** Grids were prepared on a Vitrobot mark IV (Thermo Fisher  
545 Scientific). The setting were as follows: Temperature set to  $10\ ^\circ\text{C}$ , Humidity at 100 %, Blotting  
546 time varied in the 3-7 s range, Blotting force set to 0, Wait time of 10s. BG505-SOSIP-T33\_dn10  
547 nanoparticle sample was concentrated to 1.6 mg/ml and BG505-SOSIP-I53\_dn5 nanoparticle was  
548 concentrated to 1.7 mg/ml. Lauryl maltose neopentyl glycol (LMNG) at a final concentration of  
549 0.005 mM was used for sample freezing. Quantifoil R 2/1 holey carbon copper grid (Cu 400 mesh)  
550 were treated with Ar/O<sub>2</sub> plasma (Solarus plasma cleaner, Gatan) for 10s before sample loading.  
551 Sample was mixed with the appropriate volume of LMNG solution and 3  $\mu\text{l}$  immediately loaded  
552 onto the grid. Following the blot step the grids were plunge-frozen into nitrogen-cooled liquid  
553 ethane.

554 - **Cryo-EM data collection.** Cryo-grids were loaded into a Talos Arctica TEM (Thermo Fisher  
555 Scientific) operating at 200 kV, equipped with the K2 direct electron detector camera (Gatan) and  
556 sample autoloader. Total exposure was split into 250 ms frames with a total cumulative dose of  
557  $\sim 50\ \text{e}^-/\text{\AA}^2$ . Exposure magnification of 36,000 was set with the resulting pixel size of  $1.15\ \text{\AA}$  at the  
558 specimen plane. For BG505-SOSIP-T33\_dn10 nanoparticle imaging the nominal defocus range

559 was -0.6 to -2.0  $\mu\text{m}$ . The range was -0.8 to -2.0 for BG505-SOSIP-I53\_dn5. Automated data  
560 collection was performed using Leginon software (76). The data collection details for the acquired  
561 datasets are presented in Supplement Table II.

562 - **Cryo-EM image processing.** MotionCor2 (77) was used to align and dose-weight the movie  
563 micrographs and the aligned micrographs were uploaded to cryoSPARC 2.9.0 (78). GCTF was  
564 then applied to estimate the CTF parameters. Particles were picked using template picker, extracted  
565 and 2D classified. Selected subsets of particles were then transferred to Relion/3.0 (74) for further  
566 processing. A reference model was generated using Ab-Initio Reconstruction in cryoSPARC 2.9.0.  
567 Multiple rounds of 3D classification and refinement were used to sort out a subpopulation of  
568 particles that went into the final 3D reconstructions. Tetrahedral and Icosahedral symmetry  
569 restraints were applied for all 3D refinement / classification steps during the processing of BG505-  
570 SOSIP-T33\_dn10 and BG505-SOSIP-I53\_dn5 datasets, respectively. A soft solvent mask around  
571 the nanoparticle core was introduced during the final 3D classification, refinement and post-  
572 processing steps in order to eliminate the signal originating from flexibly-linked BG505-  
573 SOSIP.v5.2(7S) trimers. Localized reconstruction v1.2.0 (64) was applied to obtain higher  
574 resolution information on the presented antigens. Vectors used for subparticle extraction were  
575 defined using sets of Chimera marker coordinates for each geometry (tetrahedral and icosahedral).  
576 Part of the signal corresponding to the nanoparticle core was subtracted from aligned particles and  
577 the trimer subparticles are extracted. Trimer subparticles are then subjected to 2D and 3D  
578 classification using a combination of Relion 3.0 and cryoSPARC 2.9.0 packages. Final subset of  
579 clean trimer subparticles was 3D-refined with C3 symmetry. A soft solvent mask around the  
580 reconstructed trimer was applied for refinement and post-processing steps. A graphical summary  
581 of the data processing approach and relevant statistics are displayed in Supplementary Figures S5

582 and S6. Final post-processed maps, half-maps and masks used for refinement and postprocessing  
583 were submitted to The Electron Microscopy Data Bank (EMDB). EMD IDs: 21183 (I53\_dn5  
584 nanoparticle core), 21184 (BG505-SOSIP reconstructed from BG505-SOSIP\_I53\_dn5), 21185  
585 (T33\_dn10 nanoparticle core), 21186 (BG505-SOSIP reconstructed from BG505-  
586 SOSIP\_T33\_dn10).

587 - **Model building and refinement.** B-factor-sharpened maps corresponding to the T33\_dn10  
588 nanoparticle core and fused BG505-SOSIP.v5.2(7S) antigen generated in the previous step were  
589 used for model building and refinement. T33\_dn10 model from Rosetta design was used for NP  
590 core refinement (with tetrahedral symmetry). BG505-SOSIP structure from PDB entry 5CEZ (65)  
591 was used as a starting model for trimer refinement (with C3 symmetry imposed). Iterative rounds  
592 of Rosetta relaxed refinement (62) and manual refinement in Coot (63) were performed to generate  
593 the final structures. EMRinger (79) and MolProbity (80) analysis was applied to evaluate the  
594 refined models. The refined models of T33\_dn10 nanoparticle core and BG505-SOSIP  
595 (reconstructed from BG505-SOSIP-T33\_dn10 nanoparticle) were submitted to the Protein Data  
596 Bank (PDB). PDB IDs: 6VFK (T33\_dn10 nanoparticle core); 6VFL (BG505-SOSIP reconstructed  
597 from BG505-SOSIP\_T33\_dn10).

598 - **Biolayer interferometry.** Antibodies (IgG) were diluted in kinetics buffer (DPBS + 0.1 % BSA  
599 + 0.02 % Tween-20) to 5 µg/ml. Trimer and nanoparticle concentrations were normalized based  
600 on the molar concentration of the antigen (BG505-SOSIP.v5.2(7S) trimer) in each sample. Final  
601 BG505-SOSIP.v5.2(7S) concentration in the test samples was 500 nM. Free BG505-  
602 SOSIP.v5.2(7S) trimer was used as a positive control and a reference. Data was acquired on an  
603 Octet Red96 instrument (ForteBio). Antibodies were loaded onto anti-human IgG Fc capture  
604 (AHC) biosensors (ForteBio) and moved into the sample solutions at appropriate concentrations.

605 Association and dissociation steps were monitored for 180 s and 300 s, respectively. All data was  
606 analyzed using the ForteBio data processing package. Background was corrected by subtracting  
607 kinetics buffer dataset (negative control). The resulting binding curves for each antibody were  
608 corrected by aligning y-axes to the baseline step immediately preceding the association step and  
609 subsequently applying interstep correction between the association and dissociation. Baseline-  
610 corrected, aligned binding data was exported to Excel and plotted.

611 - **Surface Plasmon Resonance.** Antigenicity of ConM-SOSIP-T33\_dn2 nanoparticles and free  
612 ConM-SOSIP.v7 envelope trimer was investigated by using surface plasmon resonance (SPR). All  
613 experiments were conducted at 25 °C on BIAcore 3000 instrument. HBS-EP (GE healthcare Life  
614 sciences) was used as running buffer throughout the analysis. To analyze binding of ConM-SOSIP-  
615 T33\_dn2 nanoparticles and ConM-SOSIP.v7 trimers in solution, monoclonal antibodies (mAbs)  
616 were immobilized on CM3 sensor surface via covalently linked anti-Fc fragment. Affinity-purified  
617 goat anti-human IgG Fc (Bethyl Laboratories, Inc.) and goat anti-Rabbit IgG Fc (Abcam, USA)  
618 was amine coupled to CM3 surface, to capture human/Macaques and Rabbit mAbs, respectively.  
619 Both IgG Fc fragments were captured to a density of 5000 RU, as described elsewhere (37). ConM-  
620 SOSIP-T33\_dn2 (5nM), and ConM-SOSIP.v7 trimer (20 nM) were used to analyze their binding  
621 to selected mAbs. In each experiment, 3 flow cells were used to capture IgG of mAbs on anti-Fc  
622 surface at an average density of 319 RU, with a standard deviation of  $\pm 16$  RU (SEM=1.5 RU),  
623 while one flow cell was used as reference. In each cycle, analyte (NP or trimer) was allowed to  
624 associate for 300 s, followed by dissociation for 600 s. At the end of each cycle, surface was  
625 regenerated with a single pulse of 75  $\mu$ l of 10 mM Glycine (pH 2.0) at flow rate of 75  $\mu$ l/min. MW  
626 of the peptide portion of ConM-SOSIP.v7 is 325 kDa with glycans and of ConM-SOSIP-T33\_dn2

627 is 1.658 MDa with glycans. Data analysis and interpretation in experiments with nanoparticles and  
628 soluble antigens is described elsewhere (37).

629 - **Nanoparticle stability tests.** For pH sensitivity assessment, 3 aliquots of 5  $\mu$ g of each  
630 nanoparticle sample (stored in TBS) were diluted using a set of concentrated Tris/Acetate buffers  
631 of different pH (100 mM Tris-Base + 150mM NaCl, pH adjusted with glacial acetic acid to pH 5,  
632 7 and 9) and incubated at room temperature for 1 hour. Salt sensitivity assays were performed by  
633 diluting the same amount of each nanoparticle sample into buffers of different NaCl concentration  
634 (25 mM Tris + 25 / 150 / 1000 mM NaCl, pH 7.4), and subsequent incubation for 1 hour at room  
635 temperature. Temperature sensitivity was probed by incubating nanoparticles in TBS at a range of  
636 temperatures (25, 37, 50, 65  $^{\circ}$ C) for 1 hour. Sensitivity to freeze-thaw was probed by 1 or 2 rounds  
637 of flash-freezing in liquid nitrogen for 5 min followed by a gentle thaw at 4  $^{\circ}$ C for 1 hour. Sample  
638 homogeneity was assessed using Native PAGE (NativePAGE 3-12 % BisTris Protein Gels), dark  
639 blue cathode protocol for NativePAGE<sup>TM</sup> Novex<sup>®</sup> Bis-Tris Gel system (Thermo Fisher Scientific).  
640 Gels were fixed and de-stained using the recommended protocol and imaged.

641 - **N-glycan analysis using hydrophilic interaction chromatography-ultra-high-performance**  
642 **liquid chromatography (HILIC-UPLC).** N-glycan profiling using HILIC-UPLC has been  
643 described in detail elsewhere (71, 81). In short, N-linked glycans were released from gp140 in-gel  
644 using PNGase F (New England Biolabs). The released glycans were subsequently fluorescently  
645 labelled with procainamide and excess label and PNGase F was removed using Spe-ed Amide-2  
646 cartridges (Applied Separations). Glycans were analyzed on a Waters Acquity H-Class UPLC  
647 instrument with a Glycan BEH Amide column (2.1 mm x 100 mm, 1.7  $\mu$ M, Waters). Fluorescence  
648 was measured, and data were processed using Empower 3 software (Waters, Manchester, UK).  
649 The relative abundance of oligomannose glycans was measured by digestion with Endoglycosidase

650 H (Endo H; New England Biolabs). Digested glycans were cleaned using a PVDF protein-binding  
651 membrane (Millipore) and analyzed as described above.

652 - **Site-specific glycan analysis using mass spectrometry.** Env proteins were denatured for 1h in  
653 50 mM Tris/HCl, pH 8.0 containing 6 M of urea and 5 mM dithiothreitol (DTT). Next, the Env  
654 proteins were reduced and alkylated by adding 20 mM iodacetamide (IAA) and incubated for 1h  
655 in the dark, followed by a 1h incubation with 20 mM DTT to eliminate residual IAA. The alkylated  
656 Env proteins were buffer-exchanged into 50 mM Tris/HCl, pH 8.0 using Vivaspin columns (3  
657 kDa) and digested separately O/N using trypsin or chymotrypsin (Mass Spectrometry Grade,  
658 Promega) at a ratio of 1:30 (w/w). The next day, the peptides were dried and extracted using C18  
659 Zip-tip (MerckMilipore). The peptides were dried again, re-suspended in 0.1 % formic acid and  
660 analyzed by nanoLC-ESI MS with an Easy-nLC 1200 (Thermo Fisher Scientific) system coupled  
661 to a Fusion mass spectrometer (Thermo Fisher Scientific) using higher energy collision-induced  
662 dissociation (HCD) fragmentation. Peptides were separated using an EasySpray PepMap RSLC  
663 C18 column (75  $\mu$ m x 75 cm). The LC conditions were as follows: 275-minute linear gradient  
664 consisting of 0-32 % acetonitrile in 0.1 % formic acid over 240 minutes followed by 35 minutes  
665 of 80 % acetonitrile in 0.1 % formic acid. The flow rate was set to 200 nL/min. The spray voltage  
666 was set to 2.7 kV and the temperature of the heated capillary was set to 40 °C. The ion transfer  
667 tube temperature was set to 275 °C. The scan range was 400-1600 m/z. The HCD collision energy  
668 was set to 50 %, appropriate for fragmentation of glycopeptide ions. Precursor and fragment  
669 detection were performed using an Orbitrap at a resolution  $MS_1=100,000$ .  $MS_2=30,000$ . The AGC  
670 target for  $MS_1=4e^5$  and  $MS_2=5e^4$  and injection time:  $MS_1=50$  ms  $MS_2=54$  ms.

671 Glycopeptide fragmentation data were extracted from the raw file using Byonic<sup>TM</sup> (Version 3.5)  
672 and Byologic<sup>TM</sup> software (Version 3.5; Protein Metrics Inc.). The glycopeptide fragmentation data

673 were evaluated manually for each glycopeptide; the peptide was scored as true-positive when the  
674 correct b and y fragment ions were observed along with oxonium ions corresponding to the glycan  
675 identified. The MS data was searched using a standard library for HEK293F expressed BG505  
676 SOSIP.664. The relative amounts of each glycan at each site as well as the unoccupied proportion  
677 were determined by comparing the extracted chromatographic areas for different glycotypes with  
678 an identical peptide sequence. The precursor mass tolerance was set at 4 ppm and 10 ppm for  
679 fragments. A 1 % false discovery rate (FDR) was applied. The relative amounts of each glycan at  
680 each site as well as the unoccupied proportion were determined by comparing the extracted ion  
681 chromatographic areas for different glycopeptides with an identical peptide sequence.

682 - **Site-specific analysis of low abundance N-glycan sites using mass spectrometry.** To obtain  
683 data for sites that frequently present low intensity glycopeptide the glycans present on the  
684 glycopeptides were homogenized to boost the intensity of these peptides. A separate tryptic digest  
685 was used for this workflow. This analysis loses fine processing information but enables the ratio  
686 of oligomannose: complex: unoccupied to be determined. The peptides were first digested with  
687 Endo H (New England Biolabs) to deplete oligomannose- and hybrid-type glycans and leave a  
688 single GlcNAc residue at the corresponding site. The reaction mixture was then dried completely  
689 and resuspended in a mixture containing 50 mM ammonium bicarbonate and PNGase F (New  
690 England Biolabs) using only H<sub>2</sub><sup>18</sup>O (Sigma-Aldrich) throughout. This second reaction cleaves the  
691 remaining complex-type glycans but leaves the GlcNAc residues remaining after Endo H cleavage  
692 intact. The use of H<sub>2</sub><sup>18</sup>O in this reaction enables complex glycan sites to be differentiated from  
693 unoccupied glycan sites as the hydrolysis of the glycosidic bond by PNGaseF leaves a heavy  
694 oxygen isotope on the resulting aspartic acid residue. The resultant peptides were purified as  
695 outlined above and subjected to reverse-phase (RP) nanoLC-MS. Instead of the extensive N-glycan

696 library used above, two modifications were searched for: +203 Da corresponding to a single  
697 GlcNAc, a remnant of an oligomannose/hybrid glycan, and +3 Da corresponding to the <sup>18</sup>O  
698 deamidation product of a complex glycan. A lower HCD energy of 27 % was used as glycan  
699 fragmentation was not required. Data analysis was performed as above and the relative amounts  
700 of each glycoform determined, including unoccupied peptides.

701 - **B cell activation assays.** B cell activation experiments were performed as previously described  
702 (55). K46 cells expressing doxycycline-inducible VRC01, PGT145 and PGT121 receptors (in a  
703 form of IgM) were grown in advanced Dulbecco's modified Eagle's medium (DMEM) (Gibco),  
704 supplemented with 10 % fetal calf serum, penicillin/streptomycin antibiotics, and puromycin (2  
705 µg/ml; Gibco). 1 µg/ml Doxycycline was added overnight to induce BCR expression. Cells were  
706 spun down (500 g, 3 min, room temperature) and resuspended in RPMI 1640 media supplemented  
707 with GlutaMAX (1X), 10% FBS, penicillin/streptomycin antibiotics (1X), 2-mercaptoethanol,  
708 with 1.5 µM Indo-I fluorescent dye (Thermo Fisher Scientific). Cells were incubated for 1 hour  
709 with the dye at 37 °C, washed 3 times with cold PBS and transferred to fresh cold media that does  
710 not contain Indo-I (cell density: 1 \* 10<sup>6</sup> cells/ml). Calcium mobilization was recorded on an LSR  
711 II flow cytometer (BD Biosciences) by measuring the 405/485-nm emission ratio of Indo-1  
712 fluorescence upon UV excitation at room temperature. Trimer and nanoparticle samples were  
713 normalized to contain an equimolar amount of BG505-SOSIP.v5.2(7S) antigen in each sample  
714 (7.5 nM final assay concentration). Anti-mouse IgM antibody (Jackson ImmunoResearch) at 10  
715 µg/ml was used as a positive control. 1 ml Aliquots of Indo-I treated cells (cell density: 1 \* 10<sup>6</sup>  
716 cells/ml) were incubated for 60 s for the baseline signal to be recorded, after which they are  
717 stimulated with an antigen for 180 s. Immediately following this step, ionomycin (at 1 µg/ml) is



718 added to the cells and the signal was recorded for another 60 s to verify Indo-I loading. Data  
719 analysis was performed using FlowJo (Tree Star, Ashland, OR).

720 - **Immunization experiments.** Immunizations and blood draws were performed by Covance  
721 Research Products Inc. under permits with approval number C0171-017 (Denver, PA, USA). 2  
722 groups of 5 female New Zealand White Rabbits were immunized at weeks 0, 4 and 20 with ConM-  
723 SOSIP.v7 (Group 1, 30 µg/dose) and ConM-SOSIP-T33\_dn2 nanoparticle (Group 2, 43 µg/dose)  
724 Total dose was normalized to achieve an equivalent molar concentration of ConM-SOSIP.v7  
725 antigen across all animals. Peptidic molecular weight of the protein was used for dose calculations  
726 (disregarding glycan). Immunogens were formulated with GLA-LSQ adjuvant (25 µg GLA and  
727 10 µg QS21 per dose; The Infectious Disease Research Institute (IDRI), Seattle, WA). Rabbits  
728 were immunized with antigen-adjuvant formulation via intramuscular route. The dose was split in  
729 half and injected into both quadriceps. Blood draws were performed at weeks 0, 2, 4, 6, 8, 12, 16,  
730 20 and 22. These experiments were performed in parallel with ConM-SOSIP.v7 immunization  
731 experiments reported elsewhere (37) and the data acquired for ConM-SOSIP.v7 control group  
732 (Group 1) is shared between two studies.

733 - **ELISA binding assays.** Experiments were performed as described previously (37). ConM-  
734 SOSIP.v7 carrying a C-terminal His-tag (diluted to 6.5nM in TBS) was immobilized onto 96-well  
735 Ni-NTA ELISA plates (Qiagen) by incubation for 2 hours at room temperature after which the  
736 plates were washed 3 times with TBS. Plates were blocked with TBS + 2 % skimmed milk and  
737 washed 3 times with TBS. For experiments with T33\_dn2 nanoparticle core, 6nM final  
738 concentration of the antigen was used for plate preparation. Serial three-fold sera dilutions were  
739 prepared in the binding buffer (TBS + 2 % skimmed milk + 20 % sheep serum) starting at a  
740 minimum of 1:200. For experiments with T33\_dn2 nanoparticle core the starting dilution was

741 1:1000. Diluted samples were incubated on the plates for 2 hours at room temperature. Following  
742 3 washes with TBS, HRP-conjugated goat anti-rabbit IgG (Jackson ImmunoResearch) in TBS +  
743 2% skimmed milk was added for 1 hour at room temperature. Detection antibody was diluted  
744 1:3000. Plates were washed 5 times with TBS + 0.05% Tween-20, followed by the addition of  
745 developing solution (1% 3,3',5,5'-tetranethylbenzidine (Sigma-Aldrich) + 0.01% hydrogen  
746 peroxide, 100 mM sodium acetate and 100 mM citric acid) was added. Colorimetric endpoint  
747 development was allowed to proceed for 3 min before termination by 0.8 M H<sub>2</sub>SO<sub>4</sub>. Endpoint titers  
748 were determined using Graphpad Prism software.

749 - **Virus neutralization assays.** Pseudovirus neutralization assays were performed at Amsterdam  
750 University Medical Center (AUMC) as described previously (82). Serial 3-fold dilutions of rabbit  
751 sera samples (starting at 1:20 or 1:100 dilution) were prepared and tested against ConM-  
752 pseudotyped virus in TZM-bl cells in a 96-well format. Midpoint titers (IC<sub>50</sub>) were determined  
753 using Graphpad Prism software.

754 - **EM-based polyclonal epitope mapping – Preparation of Fab and complex samples.**  
755 Experiments were performed as described previously (69). Briefly, serum samples (weeks 4 and  
756 22) from 2 immunized animals with highest neutralization titers in each group were selected for  
757 polyclonal epitope mapping. Animal ID of selected animals: r2381 (Group 1), r2382 (Group 1),  
758 r2383 (Group 2) and r2385 (Group 2). IgGs were purified from ~1-3 ml of serum using equal  
759 volume of settled Protein A Sepharose resin (GE Healthcare). Samples were eluted off the resin  
760 with 0.1 M glycine pH 2.5 and immediately neutralized with 1 M Tris-HCl pH 8. Amicon  
761 ultrafiltration units, 10 kDa cutoff (Millipore Sigma) were used to concentrate the purified IgG  
762 and buffer exchange to the digestion buffer (PBS + 10 mM EDTA + 20 mM cysteine, pH 7.4).  
763 IgG samples were digested for 5 hours at 37 °C using 50 µl of settled papain-agarose resin (Thermo

764 Fisher Scientific). Fc and non-digested IgG were removed by 1-hour incubation with Protein A  
765 Sepharose resin, using 0.2ml packed resin per 1 mg of starting IgG amount (room temperature).  
766 Fab samples were concentrated to ~2-3 mg/ml using Amicon ultrafiltration units, 10 kDa cutoff  
767 (Millipore Sigma), and in the process buffer was exchanged to TBS. Final Fab yields were ~300  
768 µg. Initial assembly trials were performed with 250 µg of purified Fab samples and 15 µg of  
769 ConM-SOSIP.v7 for ~18 hours at room temperature, but we observed that Fab binding caused  
770 >70% of these trimers to dissociate into gp120-gp41 monomers. Accordingly, it was not possible  
771 to use the EMPEM data to reliably assign epitopes (Supplementary Figure S9.a). Instead, we  
772 complexed the purified Fabs with ConM-SOSIP.v9 trimers, which contain additional stabilizing  
773 mutations that do not affect antigenicity (see Methods, and Supplementary Table I, Supplementary  
774 Figure S9. a and b). When the more stabilized trimer was used for EMPEM, only <5% of the  
775 trimers dissociated into gp120-gp41 monomers after Fab binding, which allowed us to assign the  
776 recognized epitopes more reliably (Supplementary Figure S9.a). Hence, the complexing was  
777 performed with 250 µg of polyclonal Fab and 15 µg of ConM-SOSIP.v9. Complexes were purified  
778 using SEC (Superose 6 Increase column) with TBS as a running buffer, concentrated with Amicon  
779 ultrafiltration units (10 kDa cutoff) and immediately loaded onto the carbon-coated 400-mesh Cu  
780 grid (glow-discharged at 15 mA for 25 s). Samples were diluted in TBS to 50 µg /ml prior to  
781 loading. Grids stained with 2 % (w/v) uranyl-formate for 60 s.

782 - **EM-based polyclonal epitope mapping – Sample imaging and data processing.** Imaging was  
783 performed as described above in the negative stain electron microscopy method section. All initial  
784 processing was performed using the Appion data processing package (83). Approximately,  
785 120,000 – 150,000 particles are picked and extracted. Particles were then 2D-classified in Relion  
786 3.0 (74) into 250 classes (50 iterations), and particles with complex-like features (~70-90% of the

787 starting number) were selected for 3D sorting in Relion 3.0. A low-resolution model of non-  
788 liganded HIV Env ectodomain was used as a reference for all 3D steps. Initial 3D classification  
789 was performed with 40 classes. Particles from similar looking classes were then pooled and  
790 reclassified. A subset of 3D classes with unique structural features (in terms of Fab specificities)  
791 was subjected to 3D auto-refinement in Relion 3.0. Maps from 3D refinement were loaded into  
792 UCSF Chimera 1.13 (75) for visualization, segmentation and figure preparation. 3D refinement  
793 was performed on a subset of 2D-cleaned particles (following the initial 2D classification step and  
794 before any 3D classification) and the refined model is submitted to EMDB. The list of EMDB IDs:  
795 21175 (ConM-SOSIP.v9 + Wk4-r2381 polyclonal Fab); 21176 (ConM-SOSIP.v9 + Wk4-r2382  
796 polyclonal Fab); 21177 (ConM-SOSIP.v9 + Wk4-r2383 polyclonal Fab); 21178 (ConM-SOSIP.v9  
797 + Wk4-r2385 polyclonal Fab); 21179 (ConM-SOSIP.v9 + Wk22-r2381 polyclonal Fab); 21180  
798 (ConM-SOSIP.v9 + Wk22-r2382 polyclonal Fab); 21181 (ConM-SOSIP.v9 + Wk22-r2383  
799 polyclonal Fab), 21182 (ConM-SOSIP.v9 + Wk22-r2385 polyclonal Fab). Full particle stacks and  
800 3D models used for Fab segmentation and generation of composite figures are available upon  
801 request.

802

### 803 **Acknowledgements**

804 The authors thank Bill Anderson, Hannah L Turner and Charles A Bowman for their help with  
805 electron microscopy, data acquisition and processing. The authors also thank Kimmo Rantalainen  
806 for providing a small-scale screening protocol for expression and evaluation of fusion constructs.  
807 The authors thank Lauren Holden for her help on the preparation of this manuscript. This work  
808 was supported by grants from the National Institute of Allergy and Infectious Diseases Center for  
809 HIV/AIDS Vaccine Immunology and Immunogen Discovery UM1AI100663 (M.C., D.N.

810 A.B.W.), Center for HIV/AIDS Vaccine Development UM1AI144462 (M.C., D.N. A.B.W.), P01  
811 AI110657 (J.P.M., R.W.S., and A.B.W.), R01 AI36082 (J.P.M.), R01AI073148 (D.N.) and  
812 R01AI128836 (D.N.); and by the Bill and Melinda Gates Foundation and the Collaboration for  
813 AIDS Vaccine Discovery (CAVD) OPP1156262 (N.P.K., D.B.), OPP1120319 (N.P.K., D.B.),  
814 OPP1115782 (A.B.W.), OPP1111923 (D.B., N.P.K., J.P.M., and R.W.S.), OPP1132237 (D.B.,  
815 N.P.K., J.P.M., and R.W.S.) and OPP1196345 (D.N. and A.B.W.); and by the National Science  
816 Foundation grant DMREF 1629214 (N.P.K., D.B.); and by the Howard Hughes Medical Institute  
817 (D.B.). This work was also supported by the European Union's Horizon 2020 research and  
818 innovation program under grant agreement No. 681137 (M.C., R.W.S.). C.A.C. is supported by a  
819 NIH F31 Ruth L. Kirschstein Predoctoral Award AI131873 and by the Achievement Rewards for  
820 College Scientists Foundation. This work was partially funded by IAVI with the generous support  
821 of USAID, Ministry of Foreign Affairs of the Netherlands, and the Bill & Melinda Gates  
822 Foundation; a full list of IAVI donors is available at [www.iavi.org](http://www.iavi.org). The contents of this manuscript  
823 are the responsibility of the authors and do not necessarily reflect the views of USAID or the US  
824 Government.  
825

## 826 **References**

- 827 1. Gause KT, Wheatley AK, Cui J, Yan Y, Kent SJ, Caruso F. Immunological Principles Guiding  
828 the Rational Design of Particles for Vaccine Delivery. *ACS Nano*. 2017;11(1):54-68.
- 829 2. Kulp DW, Steichen JM, Pauthner M, Hu X, Schiffner T, Liguori A, et al. Structure-based  
830 design of native-like HIV-1 envelope trimers to silence non-neutralizing epitopes and  
831 eliminate CD4 binding. *Nat Commun*. 2017;8(1):1655.
- 832 3. Steichen JM, Kulp DW, Tokatlian T, Escolano A, Dosenovic P, Stanfield RL, et al. HIV  
833 Vaccine Design to Target Germline Precursors of Glycan-Dependent Broadly Neutralizing  
834 Antibodies. *Immunity*. 2016;45(3):483-96.
- 835 4. Kong R, Duan H, Sheng Z, Xu K, Acharya P, Chen X, et al. Antibody Lineages with Vaccine-  
836 Induced Antigen-Binding Hotspots Develop Broad HIV Neutralization. *Cell*.  
837 2019;178(3):567-84 e19.
- 838 5. Torrents de la Pena A, Julien JP, de Taeye SW, Garces F, Guttman M, Ozorowski G, et al.  
839 Improving the Immunogenicity of Native-like HIV-1 Envelope Trimers by  
840 Hyperstabilization. *Cell Rep*. 2017;20(8):1805-17.
- 841 6. Sanders RW, Derking R, Cupo A, Julien JP, Yasmeeen A, de Val N, et al. A next-generation  
842 cleaved, soluble HIV-1 Env trimer, BG505 SOSIP.664 gp140, expresses multiple epitopes  
843 for broadly neutralizing but not non-neutralizing antibodies. *PLoS Pathog*.  
844 2013;9(9):e1003618.
- 845 7. Sharma SK, de Val N, Bale S, Guenaga J, Tran K, Feng Y, et al. Cleavage-independent HIV-  
846 1 Env trimers engineered as soluble native spike mimetics for vaccine design. *Cell Rep*.  
847 2015;11(4):539-50.

- 848 8. Sliepen K, Han BW, Bontjer I, Mooij P, Garces F, Behrens AJ, et al. Structure and  
849 immunogenicity of a stabilized HIV-1 envelope trimer based on a group-M consensus  
850 sequence. *Nat Commun.* 2019;10(1):2355.
- 851 9. Kwong PD, Mascola JR. HIV-1 Vaccines Based on Antibody Identification, B Cell Ontogeny,  
852 and Epitope Structure. *Immunity.* 2018;48(5):855-71.
- 853 10. He L, Kumar S, Allen JD, Huang D, Lin X, Mann CJ, et al. HIV-1 vaccine design through  
854 minimizing envelope metastability. *Sci Adv.* 2018;4(11):eaau6769.
- 855 11. Dubrovskaya V, Tran K, Ozorowski G, Guenaga J, Wilson R, Bale S, et al. Vaccination with  
856 Glycan-Modified HIV NFL Envelope Trimer-Liposomes Elicits Broadly Neutralizing  
857 Antibodies to Multiple Sites of Vulnerability. *Immunity.* 2019;51(5):915-29 e7.
- 858 12. de Taeye SW, Ozorowski G, Torrents de la Pena A, Guttman M, Julien JP, van den Kerkhof  
859 TL, et al. Immunogenicity of Stabilized HIV-1 Envelope Trimers with Reduced Exposure of  
860 Non-neutralizing Epitopes. *Cell.* 2015;163(7):1702-15.
- 861 13. Cheng C, Xu K, Kong R, Chuang GY, Corrigan AR, Geng H, et al. Consistent elicitation of  
862 cross-clade HIV-neutralizing responses achieved in guinea pigs after fusion peptide priming  
863 by repetitive envelope trimer boosting. *PLoS One.* 2019;14(4):e0215163.
- 864 14. Pauthner M, Havenar-Daughton C, Sok D, Nkolola JP, Bastidas R, Boopathy AV, et al.  
865 Elicitation of Robust Tier 2 Neutralizing Antibody Responses in Nonhuman Primates by HIV  
866 Envelope Trimer Immunization Using Optimized Approaches. *Immunity.* 2017;46(6):1073-  
867 88 e6.
- 868 15. Xu K, Acharya P, Kong R, Cheng C, Chuang GY, Liu K, et al. Epitope-based vaccine design  
869 yields fusion peptide-directed antibodies that neutralize diverse strains of HIV-1. *Nat Med.*  
870 2018;24(6):857-67.

- 871 16. Klasse PJ, LaBranche CC, Ketas TJ, Ozorowski G, Cupo A, Pugach P, et al. Sequential and  
872 Simultaneous Immunization of Rabbits with HIV-1 Envelope Glycoprotein SOSIP.664  
873 Trimers from Clades A, B and C. *PLoS Pathog.* 2016;12(9):e1005864.
- 874 17. Whitaker N, Hickey JM, Kaur K, Xiong J, Sawant N, Cupo A, et al. Developability  
875 Assessment of Physicochemical Properties and Stability Profiles of HIV-1 BG505 SOSIP.664  
876 and BG505 SOSIP.v4.1-GT1.1 gp140 Envelope Glycoprotein Trimers as Candidate Vaccine  
877 Antigens. *J Pharm Sci.* 2019;108(7):2264-77.
- 878 18. Dey AK, Cupo A, Ozorowski G, Sharma VK, Behrens AJ, Go EP, et al. cGMP production  
879 and analysis of BG505 SOSIP.664, an extensively glycosylated, trimeric HIV-1 envelope  
880 glycoprotein vaccine candidate. *Biotechnol Bioeng.* 2018;115(4):885-99.
- 881 19. Brinkkemper M, Sliepen K. Nanoparticle Vaccines for Inducing HIV-1 Neutralizing  
882 Antibodies. *Vaccines (Basel).* 2019;7(3).
- 883 20. Bachmann MF, Jennings GT. Vaccine delivery: a matter of size, geometry, kinetics and  
884 molecular patterns. *Nat Rev Immunol.* 2010;10(11):787-96.
- 885 21. Thyagarajan R, Arunkumar N, Song W. Polyvalent antigens stabilize B cell antigen receptor  
886 surface signaling microdomains. *J Immunol.* 2003;170(12):6099-106.
- 887 22. Xu Y, Xu L, Zhao M, Xu C, Fan Y, Pierce SK, et al. No receptor stands alone: IgG B-cell  
888 receptor intrinsic and extrinsic mechanisms contribute to antibody memory. *Cell Res.*  
889 2014;24(6):651-64.
- 890 23. Dintzis HM, Dintzis RZ, Vogelstein B. Molecular determinants of immunogenicity: the  
891 immunon model of immune response. *Proc Natl Acad Sci U S A.* 1976;73(10):3671-5.
- 892 24. Liu W, Wang H, Xu C. Antigen Receptor Nanoclusters: Small Units with Big Functions.  
893 *Trends Immunol.* 2016;37(10):680-9.



- 894 25. Zhang YN, Lazarovits J, Poon W, Ouyang B, Nguyen LNM, Kingston BR, et al. Nanoparticle  
895 size influences antigen retention and presentation in lymph node follicles for humoral  
896 immunity. *Nano Lett.* 2019.
- 897 26. Tokatlian T, Read BJ, Jones CA, Kulp DW, Menis S, Chang JYH, et al. Innate immune  
898 recognition of glycans targets HIV nanoparticle immunogens to germinal centers. *Science.*  
899 2019;363(6427):649-54.
- 900 27. Gonzalez SF, Lukacs-Kornek V, Kuligowski MP, Pitcher LA, Degn SE, Kim YA, et al.  
901 Capture of influenza by medullary dendritic cells via SIGN-R1 is essential for humoral  
902 immunity in draining lymph nodes. *Nat Immunol.* 2010;11(5):427-34.
- 903 28. Manolova V, Flace A, Bauer M, Schwarz K, Saudan P, Bachmann MF. Nanoparticles target  
904 distinct dendritic cell populations according to their size. *Eur J Immunol.* 2008;38(5):1404-  
905 13.
- 906 29. Reddy ST, van der Vlies AJ, Simeoni E, Angeli V, Randolph GJ, O'Neil CP, et al. Exploiting  
907 lymphatic transport and complement activation in nanoparticle vaccines. *Nat Biotechnol.*  
908 2007;25(10):1159-64.
- 909 30. Phan TG, Grigorova I, Okada T, Cyster JG. Subcapsular encounter and complement-  
910 dependent transport of immune complexes by lymph node B cells. *Nat Immunol.*  
911 2007;8(9):992-1000.
- 912 31. Reddy ST, Rehor A, Schmoekel HG, Hubbell JA, Swartz MA. In vivo targeting of dendritic  
913 cells in lymph nodes with poly(propylene sulfide) nanoparticles. *J Control Release.*  
914 2006;112(1):26-34.
- 915 32. Thalhauser S, Peterhoff D, Wagner R, Breunig M. Critical design criteria for engineering a  
916 nanoparticulate HIV-1 vaccine. *J Control Release.* 2019;317:322-35.

- 917 33. Cirelli KM, Carnathan DG, Nogal B, Martin JT, Rodriguez OL, Upadhyay AA, et al. Slow  
918 Delivery Immunization Enhances HIV Neutralizing Antibody and Germinal Center  
919 Responses via Modulation of Immunodominance. *Cell*. 2019;177(5):1153-71 e28.
- 920 34. Marcandalli J, Fiala B, Ols S, Perotti M, de van der Schueren W, Snijder J, et al. Induction of  
921 Potent Neutralizing Antibody Responses by a Designed Protein Nanoparticle Vaccine for  
922 Respiratory Syncytial Virus. *Cell*. 2019;176(6):1420-31 e17.
- 923 35. Bale JB, Gonen S, Liu Y, Sheffler W, Ellis D, Thomas C, et al. Accurate design of  
924 megadalton-scale two-component icosahedral protein complexes. *Science*.  
925 2016;353(6297):389-94.
- 926 36. King NP, Bale JB, Sheffler W, McNamara DE, Gonen S, Gonen T, et al. Accurate design of  
927 co-assembling multi-component protein nanomaterials. *Nature*. 2014;510(7503):103-8.
- 928 37. Brouwer PJM, Antanasijevic A, Berndsen Z, Yasmeen A, Fiala B, Bijl TPL, et al. Enhancing  
929 and shaping the immunogenicity of native-like HIV-1 envelope trimers with a two-component  
930 protein nanoparticle. *Nat Commun*. 2019;10(1):4272.
- 931 38. Ueda G, Antanasijevic A, Fallas JA, Sheffler W, Copps J, Ellis D, et al. Tailored Design of  
932 Protein Nanoparticle Scaffolds for Multivalent Presentation of Viral Glycoprotein Antigens.  
933 bioRxiv. 2020.
- 934 39. Nauli S, Kuhlman B, Baker D. Computer-based redesign of a protein folding pathway. *Nat*  
935 *Struct Biol*. 2001;8(7):602-5.
- 936 40. Kuhlman B, Baker D. Native protein sequences are close to optimal for their structures. *Proc*  
937 *Natl Acad Sci U S A*. 2000;97(19):10383-8.
- 938 41. Andre I, Bradley P, Wang C, Baker D. Prediction of the structure of symmetrical protein  
939 assemblies. *Proc Natl Acad Sci U S A*. 2007;104(45):17656-61.

- 940 42. Lista A, Blier P, De Montigny C. The benzodiazepine receptor inverse agonist DMCM  
941 decreases serotonergic transmission in rat hippocampus: an in vivo electrophysiological  
942 study. *Synapse*. 1990;6(2):175-8.
- 943 43. Bresk CA, Hofer T, Wilmschen S, Krismer M, Beierfuss A, Effantin G, et al. Induction of  
944 Tier 1 HIV Neutralizing Antibodies by Envelope Trimers Incorporated into a Replication  
945 Competent Vesicular Stomatitis Virus Vector. *Viruses*. 2019;11(2).
- 946 44. Stano A, Leaman DP, Kim AS, Zhang L, Autin L, Ingale J, et al. Dense Array of Spikes on  
947 HIV-1 Virion Particles. *J Virol*. 2017;91(14).
- 948 45. Escolano A, Gristick HB, Abernathy ME, Merckenschlager J, Gautam R, Oliveira TY, et al.  
949 Immunization expands B cells specific to HIV-1 V3 glycan in mice and macaques. *Nature*.  
950 2019;570(7762):468-73.
- 951 46. Bale S, Goebrecht G, Stano A, Wilson R, Ota T, Tran K, et al. Covalent Linkage of HIV-1  
952 Trimers to Synthetic Liposomes Elicits Improved B Cell and Antibody Responses. *J Virol*.  
953 2017;91(16).
- 954 47. Martinez-Murillo P, Tran K, Guenaga J, Lindgren G, Adori M, Feng Y, et al. Particulate Array  
955 of Well-Ordered HIV Clade C Env Trimers Elicits Neutralizing Antibodies that Display a  
956 Unique V2 Cap Approach. *Immunity*. 2017;46(5):804-17 e7.
- 957 48. Ingale J, Stano A, Guenaga J, Sharma SK, Nemazee D, Zwick MB, et al. High-Density Array  
958 of Well-Ordered HIV-1 Spikes on Synthetic Liposomal Nanoparticles Efficiently Activate B  
959 Cells. *Cell Rep*. 2016;15(9):1986-99.
- 960 49. Tokatlian T, Kulp DW, Mutafyan AA, Jones CA, Menis S, Georgeson E, et al. Enhancing  
961 Humoral Responses Against HIV Envelope Trimers via Nanoparticle Delivery with  
962 Stabilized Synthetic Liposomes. *Sci Rep*. 2018;8(1):16527.

- 963 50. Cosgrove CA, Lacey CJ, Cope AV, Bartolf A, Morris G, Yan C, et al. Comparative  
964 Immunogenicity of HIV-1 gp140 Vaccine Delivered by Parenteral, and Mucosal Routes in  
965 Female Volunteers; MUCOVAC2, A Randomized Two Centre Study. PLoS One.  
966 2016;11(5):e0152038.
- 967 51. Klein K, Mann JF, Rogers P, Shattock RJ. Polymeric penetration enhancers promote humoral  
968 immune responses to mucosal vaccines. J Control Release. 2014;183:43-50.
- 969 52. Ringe RP, Cruz Portillo VM, Dosenovic P, Ketas TJ, Ozorowski G, Nogal B, et al.  
970 Neutralizing antibody induction by HIV-1 Envelope glycoprotein SOSIP trimers on iron  
971 oxide nanoparticles may be impaired by mannose binding lectin. J Virol. 2019.
- 972 53. Thalhauser S, Peterhoff D, Wagner R, Breunig M. Presentation of HIV-1 Envelope Trimers  
973 on the Surface of Silica Nanoparticles. J Pharm Sci. 2020;109(1):911-21.
- 974 54. Jardine JG, Ota T, Sok D, Pauthner M, Kulp DW, Kalyuzhniy O, et al. HIV-1 VACCINES.  
975 Priming a broadly neutralizing antibody response to HIV-1 using a germline-targeting  
976 immunogen. Science. 2015;349(6244):156-61.
- 977 55. Jardine J, Julien JP, Menis S, Ota T, Kalyuzhniy O, McGuire A, et al. Rational HIV  
978 immunogen design to target specific germline B cell receptors. Science. 2013;340(6133):711-  
979 6.
- 980 56. He L, de Val N, Morris CD, Vora N, Thinnes TC, Kong L, et al. Presenting native-like trimeric  
981 HIV-1 antigens with self-assembling nanoparticles. Nat Commun. 2016;7:12041.
- 982 57. Sliepen K, Ozorowski G, Burger JA, van Montfort T, Stunnenberg M, LaBranche C, et al.  
983 Presenting native-like HIV-1 envelope trimers on ferritin nanoparticles improves their  
984 immunogenicity. Retrovirology. 2015;12:82.

- 985 58. Georgiev IS, Joyce MG, Chen RE, Leung K, McKee K, Druz A, et al. Two-Component  
986 Ferritin Nanoparticles for Multimerization of Diverse Trimeric Antigens. *ACS Infect Dis.*  
987 2018;4(5):788-96.
- 988 59. Fallas JA, Ueda G, Sheffler W, Nguyen V, McNamara DE, Sankaran B, et al. Computational  
989 design of self-assembling cyclic protein homo-oligomers. *Nat Chem.* 2017;9(4):353-60.
- 990 60. McCoy LE, van Gils MJ, Ozorowski G, Messmer T, Briney B, Voss JE, et al. Holes in the  
991 Glycan Shield of the Native HIV Envelope Are a Target of Trimer-Elicited Neutralizing  
992 Antibodies. *Cell Rep.* 2016;16(9):2327-38.
- 993 61. Ringe RP, Pugach P, Cottrell CA, LaBranche CC, Seabright GE, Ketas TJ, et al. Closing and  
994 Opening Holes in the Glycan Shield of HIV-1 Envelope Glycoprotein SOSIP Trimers Can  
995 Redirect the Neutralizing Antibody Response to the Newly Unmasked Epitopes. *J Virol.*  
996 2019;93(4).
- 997 62. Wang RY, Song Y, Barad BA, Cheng Y, Fraser JS, DiMaio F. Automated structure  
998 refinement of macromolecular assemblies from cryo-EM maps using Rosetta. *Elife.* 2016;5.
- 999 63. Emsley P, Crispin M. Structural analysis of glycoproteins: building N-linked glycans with  
1000 Coot. *Acta Crystallogr D Struct Biol.* 2018;74(Pt 4):256-63.
- 1001 64. Ilca SL, Kotecha A, Sun X, Poranen MM, Stuart DI, Huiskonen JT. Localized reconstruction  
1002 of subunits from electron cryomicroscopy images of macromolecular complexes. *Nat*  
1003 *Commun.* 2015;6:8843.
- 1004 65. Garces F, Lee JH, de Val N, de la Pena AT, Kong L, Puchades C, et al. Affinity Maturation  
1005 of a Potent Family of HIV Antibodies Is Primarily Focused on Accommodating or Avoiding  
1006 Glycans. *Immunity.* 2015;43(6):1053-63.

- 1007 66. Lee JH, de Val N, Lyumkis D, Ward AB. Model Building and Refinement of a Natively  
1008 Glycosylated HIV-1 Env Protein by High-Resolution Cryoelectron Microscopy. *Structure*.  
1009 2015;23(10):1943-51.
- 1010 67. Ota T, Doyle-Cooper C, Cooper AB, Huber M, Falkowska E, Doores KJ, et al. Anti-HIV B  
1011 Cell lines as candidate vaccine biosensors. *J Immunol*. 2012;189(10):4816-24.
- 1012 68. Guenaga J, Dubrovskaya V, de Val N, Sharma SK, Carrette B, Ward AB, et al. Structure-  
1013 Guided Redesign Increases the Propensity of HIV Env To Generate Highly Stable Soluble  
1014 Trimers. *J Virol*. 2015;90(6):2806-17.
- 1015 69. Bianchi M, Turner HL, Nogal B, Cottrell CA, Oyen D, Pauthner M, et al. Electron-  
1016 Microscopy-Based Epitope Mapping Defines Specificities of Polyclonal Antibodies Elicited  
1017 during HIV-1 BG505 Envelope Trimer Immunization. *Immunity*. 2018;49(2):288-300 e8.
- 1018 70. Medina-Ramirez M, Garces F, Escolano A, Skog P, de Taeye SW, Del Moral-Sanchez I, et  
1019 al. Design and crystal structure of a native-like HIV-1 envelope trimer that engages multiple  
1020 broadly neutralizing antibody precursors in vivo. *J Exp Med*. 2017;214(9):2573-90.
- 1021 71. Behrens AJ, Vasiljevic S, Pritchard LK, Harvey DJ, Andev RS, Krumm SA, et al.  
1022 Composition and Antigenic Effects of Individual Glycan Sites of a Trimeric HIV-1 Envelope  
1023 Glycoprotein. *Cell Rep*. 2016;14(11):2695-706.
- 1024 72. Ozorowski G, Cupo A, Golabek M, LoPiccolo M, Ketas TA, Cavallary M, et al. Effects of  
1025 Adjuvants on HIV-1 Envelope Glycoprotein SOSIP Trimers In Vitro. *J Virol*. 2018;92(13).
- 1026 73. Lee JH, Leaman DP, Kim AS, Torrents de la Pena A, Sliepen K, Yasmeeen A, et al. Antibodies  
1027 to a conformational epitope on gp41 neutralize HIV-1 by destabilizing the Env spike. *Nat*  
1028 *Commun*. 2015;6:8167.

- 1029 74. Zivanov J, Nakane T, Forsberg BO, Kimanius D, Hagen WJ, Lindahl E, et al. New tools for  
1030 automated high-resolution cryo-EM structure determination in RELION-3. *Elife*. 2018;7.
- 1031 75. Pettersen EF, Goddard TD, Huang CC, Couch GS, Greenblatt DM, Meng EC, et al. UCSF  
1032 Chimera--a visualization system for exploratory research and analysis. *J Comput Chem*.  
1033 2004;25(13):1605-12.
- 1034 76. Suloway C, Pulokas J, Fellmann D, Cheng A, Guerra F, Quispe J, et al. Automated molecular  
1035 microscopy: the new Leginon system. *J Struct Biol*. 2005;151(1):41-60.
- 1036 77. Zheng SQ, Palovcak E, Armache JP, Verba KA, Cheng Y, Agard DA. MotionCor2:  
1037 anisotropic correction of beam-induced motion for improved cryo-electron microscopy. *Nat*  
1038 *Methods*. 2017;14(4):331-2.
- 1039 78. Punjani A, Rubinstein JL, Fleet DJ, Brubaker MA. cryoSPARC: algorithms for rapid  
1040 unsupervised cryo-EM structure determination. *Nat Methods*. 2017;14(3):290-6.
- 1041 79. Barad BA, Echols N, Wang RY, Cheng Y, DiMaio F, Adams PD, et al. EMRinger: side chain-  
1042 directed model and map validation for 3D cryo-electron microscopy. *Nat Methods*.  
1043 2015;12(10):943-6.
- 1044 80. Williams CJ, Headd JJ, Moriarty NW, Prisant MG, Videau LL, Deis LN, et al. MolProbity:  
1045 More and better reference data for improved all-atom structure validation. *Protein Sci*.  
1046 2018;27(1):293-315.
- 1047 81. Struwe WB, Chertova E, Allen JD, Seabright GE, Watanabe Y, Harvey DJ, et al. Site-Specific  
1048 Glycosylation of Virion-Derived HIV-1 Env Is Mimicked by a Soluble Trimeric Immunogen.  
1049 *Cell Rep*. 2018;24(8):1958-66 e5.

- 1050 82. Sanders RW, van Gils MJ, Derking R, Sok D, Ketas TJ, Burger JA, et al. HIV-1 VACCINES.  
1051 HIV-1 neutralizing antibodies induced by native-like envelope trimers. *Science*.  
1052 2015;349(6244):aac4223.
- 1053 83. Lander GC, Stagg SM, Voss NR, Cheng A, Fellmann D, Pulokas J, et al. Appion: an  
1054 integrated, database-driven pipeline to facilitate EM image processing. *J Struct Biol*.  
1055 2009;166(1):95-102.
- 1056
- 1057



1058 **Figures and Figure Legends**

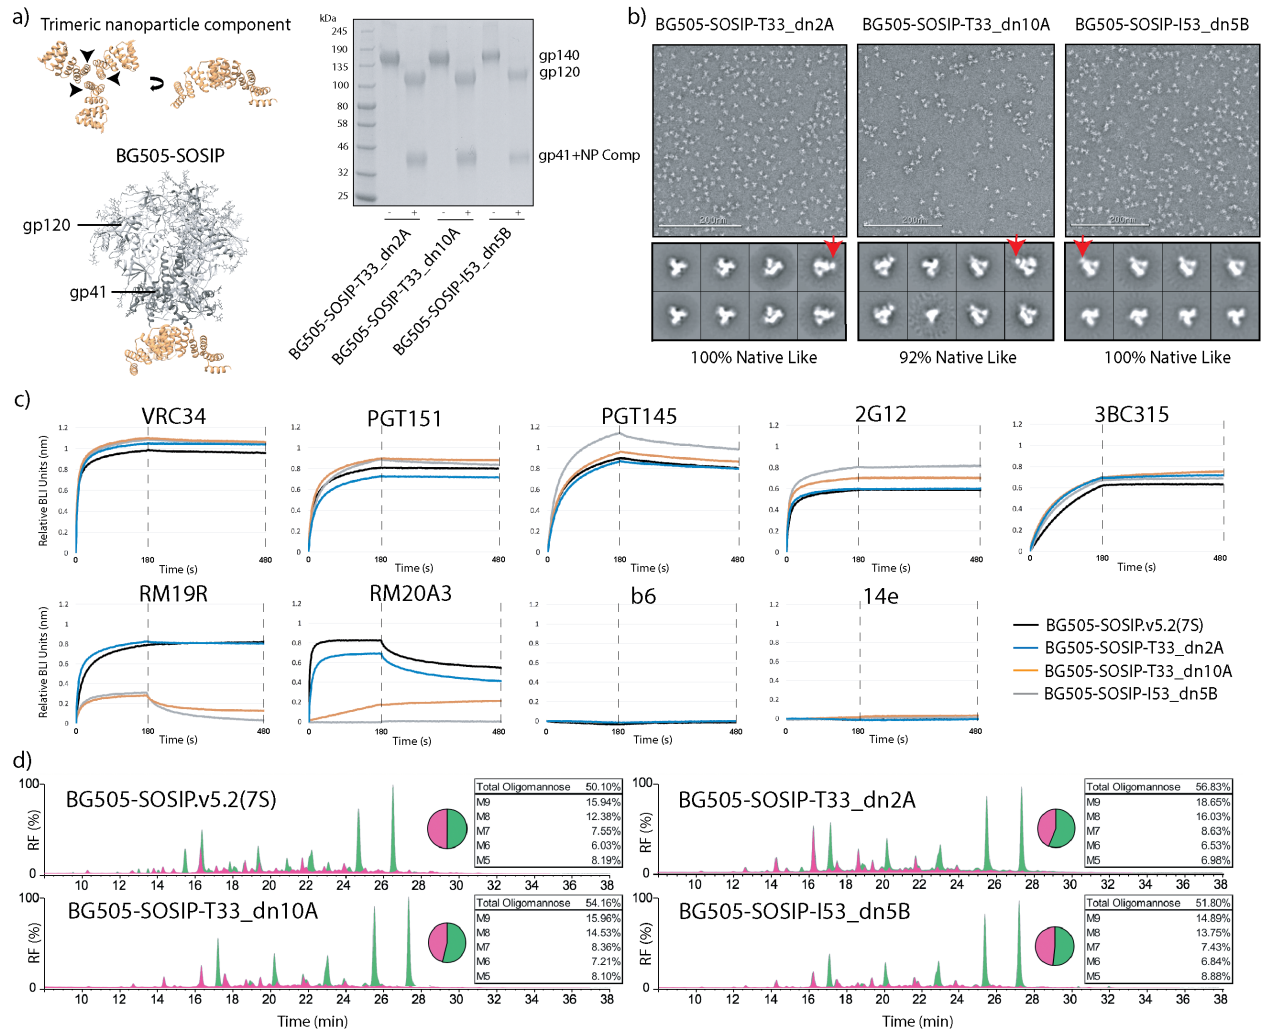

1059

1060 **Figure 1. Evaluation of the antigen-presenting components.** (a) Antigen-bearing components

1061 were generated by fusing the N-termini of trimeric nanoparticle building blocks to BG505-

1062 SOSIP.v5.2(7S) (*left*). The SDS-PAGE gel of the purified antigen-bearing components denatured

1063 in the presence (+) and absence (-) of reducing agent (*right*). (b) NS-EM analysis of the purified

1064 antigen-bearing components (representative raw micrograph and 2D class averages). Red arrows

1065 indicate the location of the fused nanoparticle component. Analysis of the resulting 2D classes

1066 suggests that the Env antigen is in a native-like, trimeric form in all three antigen-bearing

1067 components. A small percentage of monomer/dimer-like particles were detected in the BG505-

1068 SOSIP-T33\_dn10A sample (2<sup>nd</sup> class from the left in the bottom row). (c) BLI analysis of the  
1069 antigenicity of three antigen-bearing components compared to BG505-SOSIP.v5.2(7S). (d)  
1070 Glycan composition analysis for the three antigen-bearing components and BG505-  
1071 SOSIP.v5.2(7S). Peaks sensitive to endoglycosidase H digestion correspond to oligomannose-type  
1072 glycans and are colored green.  
1073  
1074

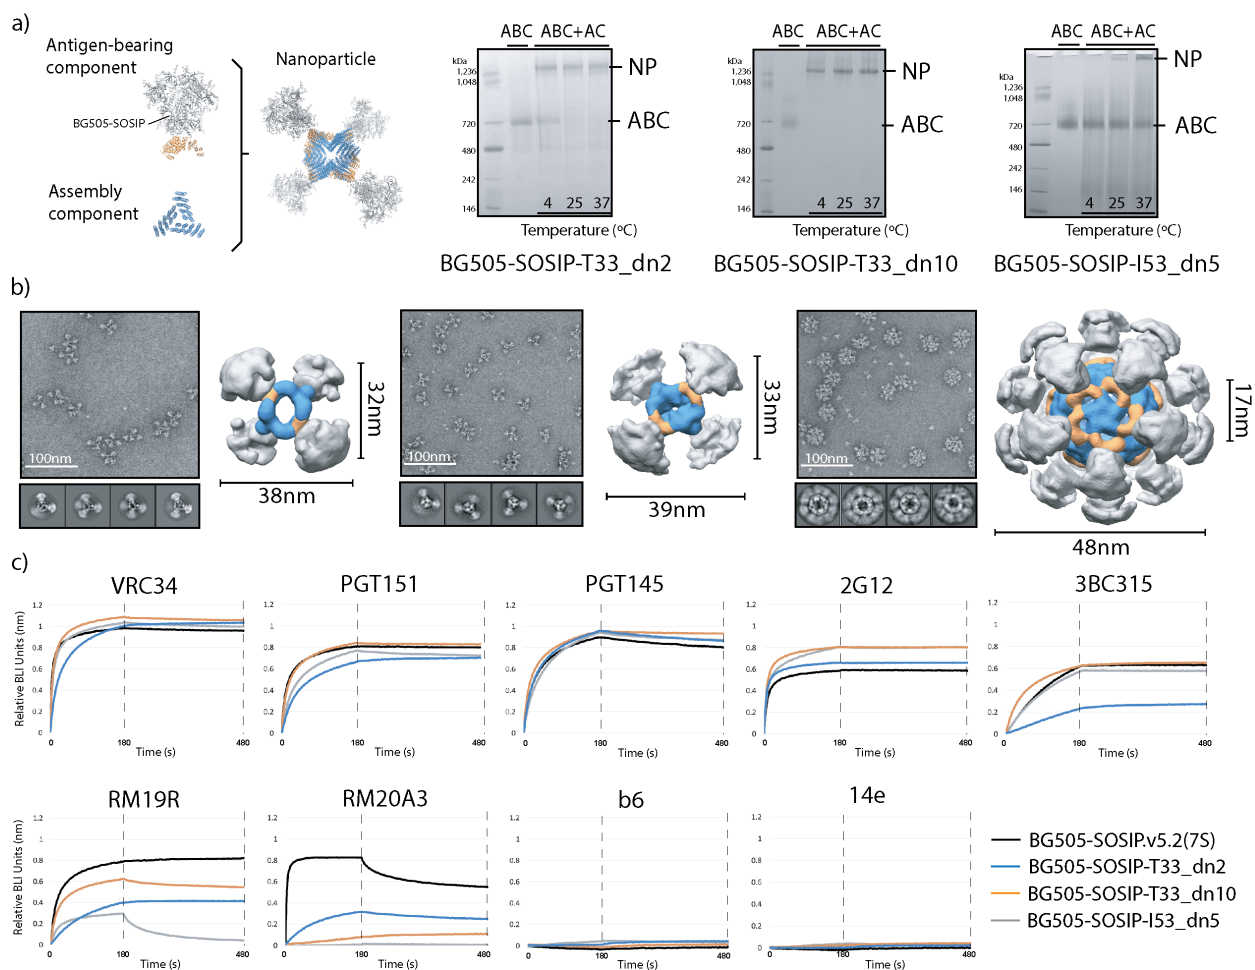

1075

1076 **Figure 2. Nanoparticle assembly and characterization.** (a) Schematic representation of  
 1077 individual components and assembled nanoparticle (*left*). Nanoparticle assembly tests were  
 1078 performed at different temperatures and the assembly efficacy was assessed using Native PAGE.  
 1079 NP, nanoparticle; ABC, antigen-bearing component; AC, assembly component; (*right*). (b)  
 1080 Negative stain EM analysis of purified nanoparticles. Representative raw micrographs, 2D class  
 1081 averages and 3D reconstructions are shown for BG505-SOSIP-T33\_dn2 (*left*), -T33\_dn10  
 1082 (middle) and -I53\_dn5 (*right*) nanoparticles. 3D maps are segmented and color-coded (BG505  
 1083 SOSIP, gray; antigen-bearing component, orange; assembly component, blue). Particle diameters  
 1084 and the average apex-apex distance between the two closest neighboring Env trimers are shown

1085 for each nanoparticle. These data are also described in Ueda et al., Submitted. (c) BLI analysis of  
1086 antigenicity of assembled nanoparticles compared to the BG505-SOSIP.v5.2(7S) trimer.

1087

1088

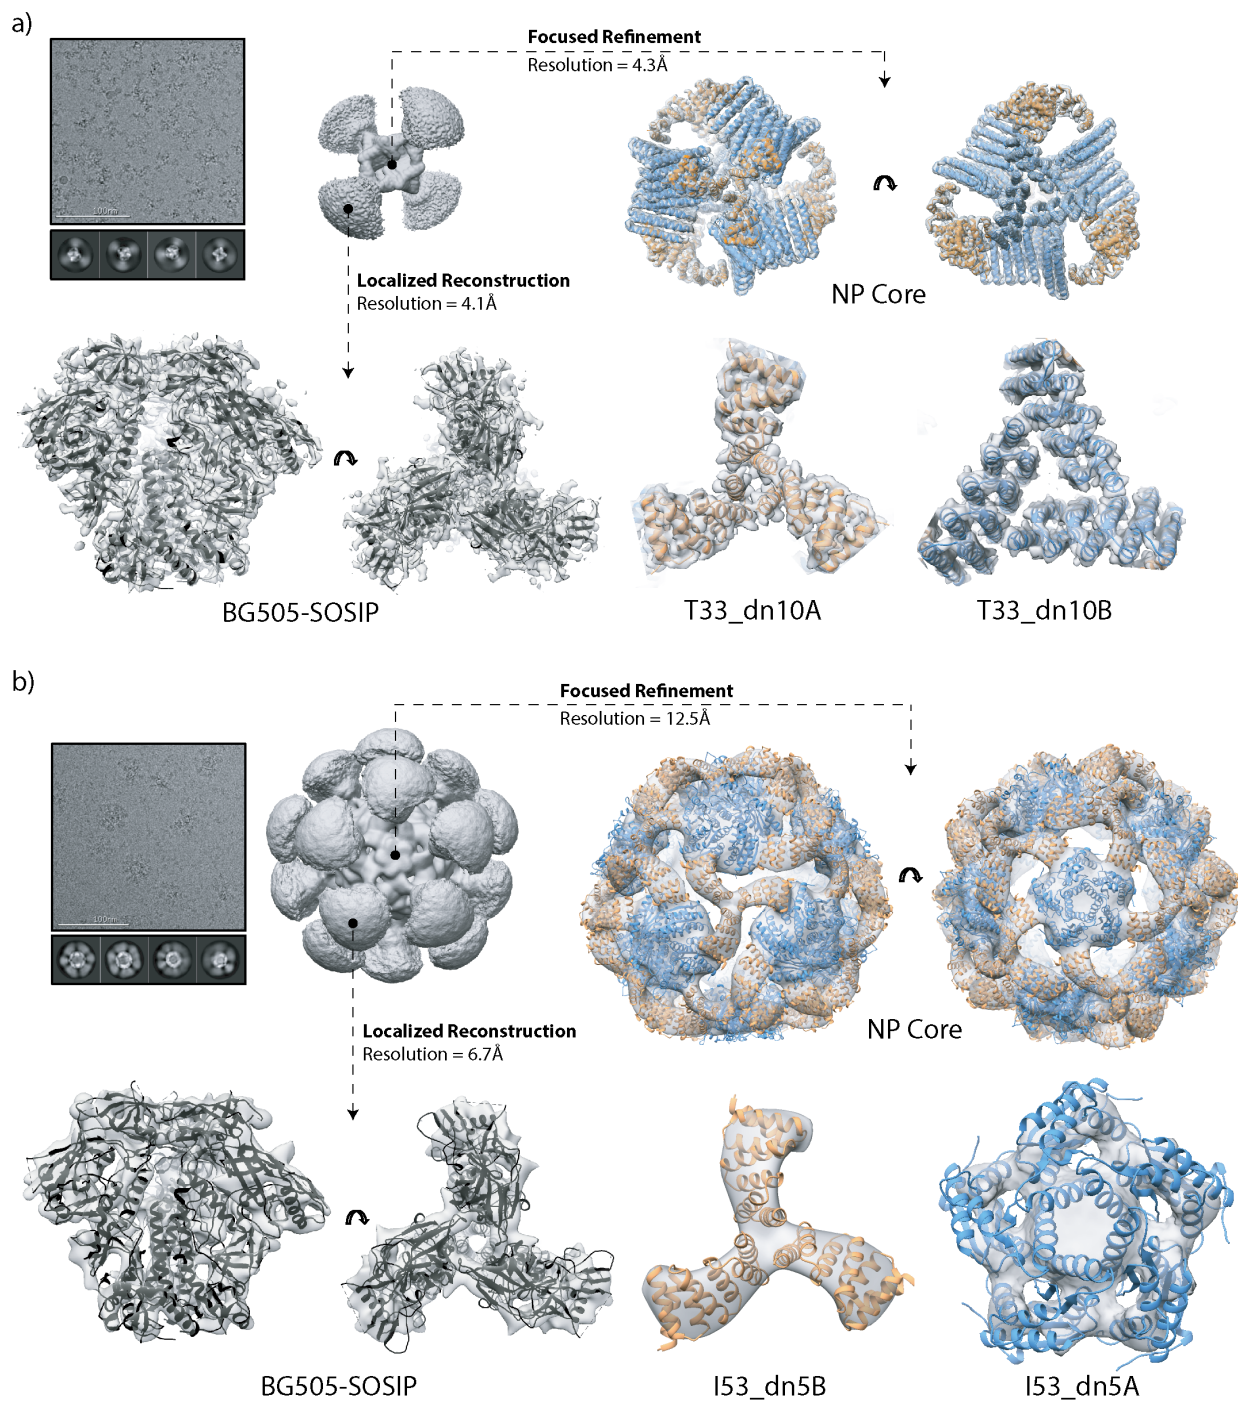

1089

BG505-SOSIP

I53\_dn5B

I53\_dn5A

1090 **Figure 3. Cryo-EM analysis of tetrahedral and icosahedral nanoparticles.** (a) Tetrahedral

1091 BG505-SOSIP-T33\_dn10 nanoparticle; (b) Icosahedral BG505-SOSIP-I53\_dn5 nanoparticle.

1092 Sample micrograph, 2D class averages and initial 3D reconstructions of the full nanoparticles are

1093 displayed in the top left part of the corresponding panels. Focused refinement was applied to

1094 generate a 3D reconstruction of the nanoparticle core (top and bottom right, maps are in light  
1095 gray). The refined model of T33\_dn10 and the Rosetta\_design model of I53\_dn5 are docked into  
1096 the corresponding maps (antigen-bearing component, orange; assembly component, blue).  
1097 Localized reconstruction approach was used for analysis of the presented antigen (bottom left).  
1098 Refined BG505-SOSIP models are shown in black.  
1099  
1100

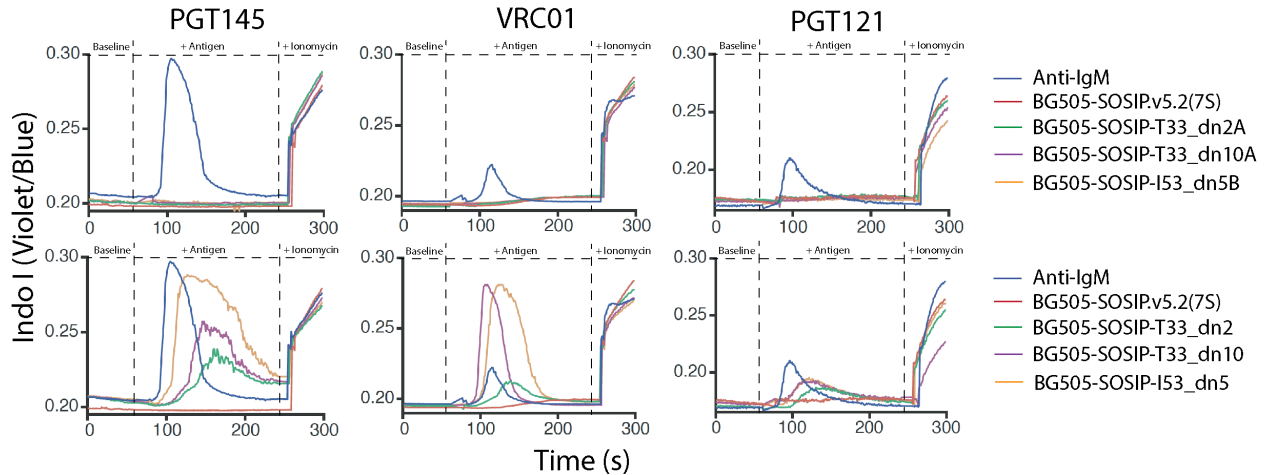

1101

1102 **Figure 4. B-cell activation by trimeric components and nanoparticles.**  $\text{Ca}^{2+}$  flux (Indo I  
1103 fluorescence) was used to assess the activation of B cells expressing HIV Env-specific IgM  
1104 receptors (PGT145, VRC01 and PGT121) by equimolar amounts of BG505-SOSIP in the form of  
1105 free trimers, fused to the antigen-bearing components (top row) and on the surface of assembled  
1106 nanoparticles (bottom row). The antigen was introduced 60 s after the start of each measurement.  
1107 Ionomycin was added after 240 s. Anti-IgM antibody was used as a positive control.

1108

1109

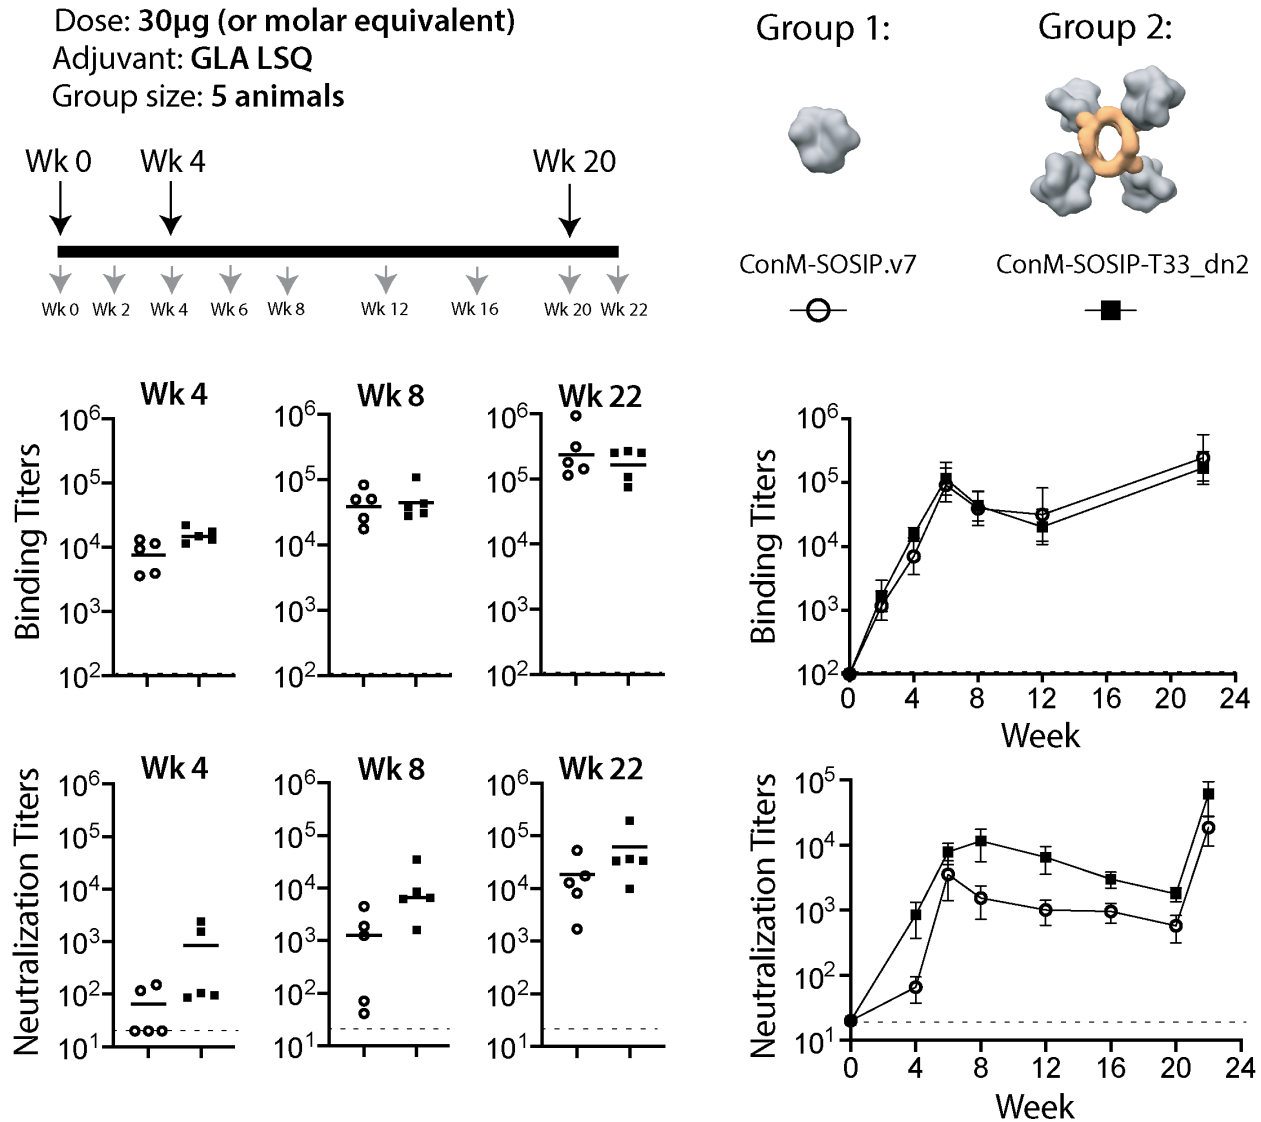

1110

1111 **Figure 5. Immunogenicity of nanoparticle-presented ConM-SOSIP.** Two groups of 5 rabbits

1112 were immunized with 30  $\mu$ g of soluble ConM-SOSIP.v7 trimer (Group 1, open circles) or the

1113 equivalent amount presented on the T33\_dn2 tetrahedral nanoparticle (Group 2, black squares).

1114 The immunization (large arrows) and bleed (small arrows) schedules are shown on the top left,

1115 and depictions of the immunogens on the top right. The serum anti-trimer binding and

1116 neutralizing antibody titers in each animal at weeks 4, 8 and 22 are presented as scatter plots with

1117 the mean titers indicated by lines. The mean titers for each group are plotted longitudinally on

1118 the right with the bars corresponding to the standard error of the mean. An AUC statistical



1119 analysis (based on two-tailed Mann-Whitney U-test) of titer values in Group 1 versus Group 2 as  
1120 a function of time results in p values of 0.69 and 0.056 for the binding and neutralization titers,  
1121 respectively. The data for Group 1 (ConM-SOSIP.v7) were adapted from Brouwer et al., 2019  
1122 (see Methods section for details).  
1123  
1124

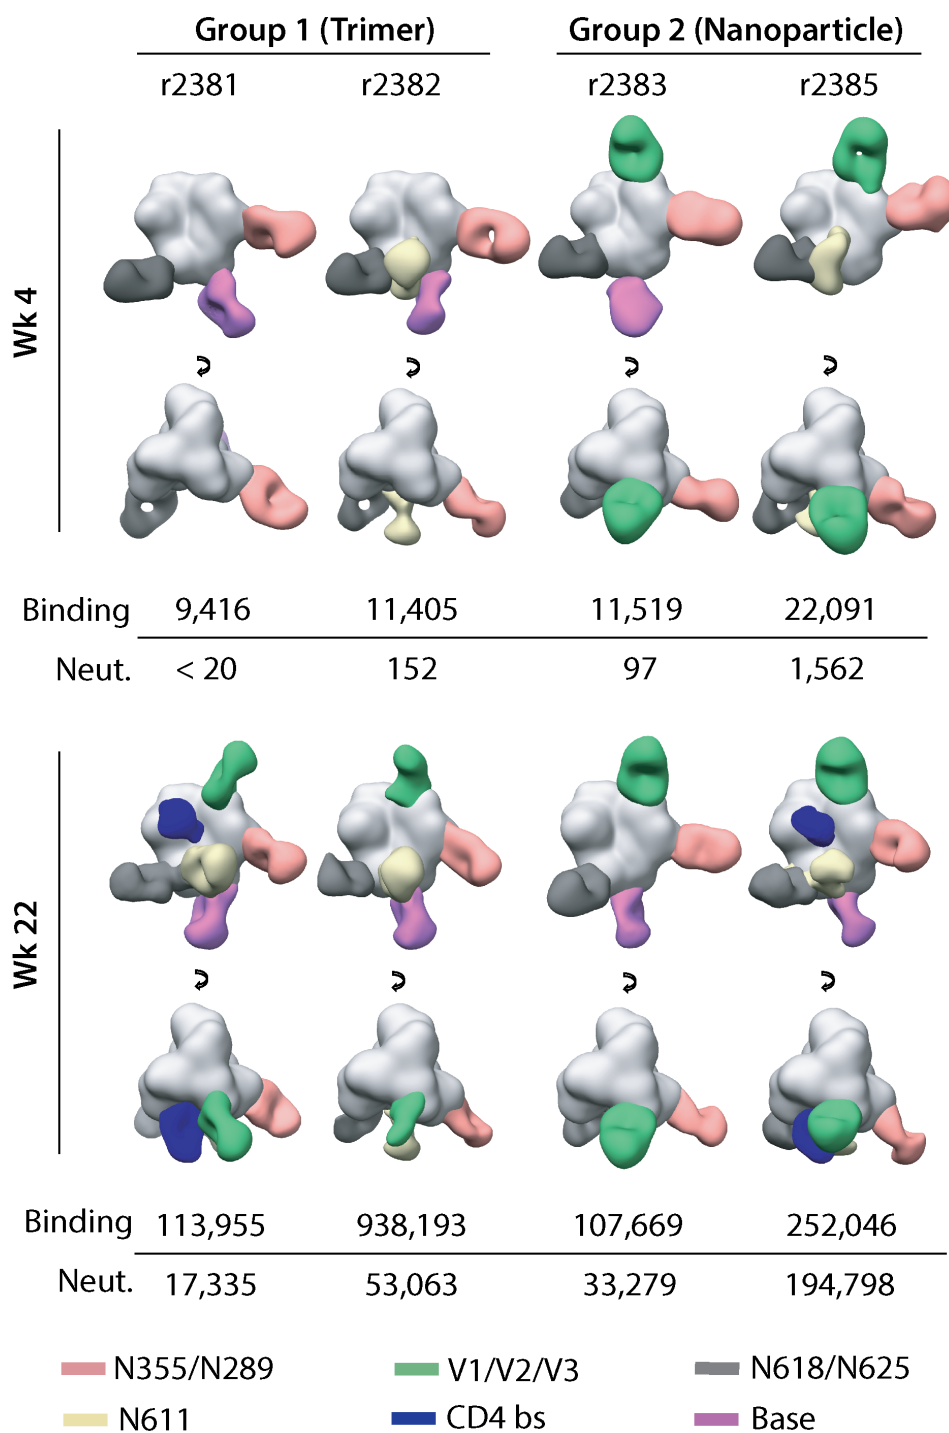

1125

1126 **Figure 6. EMPEM analysis of antibody responses in immunized animals.** Composite figures  
 1127 generated from EMPEM analysis performed using sera collected from the two animals in each  
 1128 group that have the highest ConM NAb titers at week 22. Data are shown for the week 4 (post-  
 1129 prime) and week 22 (post-final boost) time points. For simplicity, only a single antibody is shown

1130 for each epitope cluster. Epitope definitions are summarized in the text and color coded as  
1131 indicated at the foot of the figure. The anti-trimer binding antibody and neutralizing antibody titers  
1132 for each serum sample are listed below the images.

1133

1134 **Supporting Information**

1135 **Supplementary Table I.** Protein sequences of constructs used in this study

1136

1137 **Supplementary Table II.** Cryo EM data collection statistics

1138

1139 **Supplementary Table III.** Model building and refinement statistics for T33\_dn10 nanoparticle  
1140 core and presented BG505-SOSIP.

1141

1142 **Supplementary Table IV.** Anti-trimer binding antibody titers against ConM-SOSIP.v7

1143

1144 **Supplementary Table V.** Autologous neutralization titers against ConM-based pseudovirus

1145

1146 **Supplementary Figure S1. Nanoparticle library evaluated in this study.** (a) Structural models  
1147 of nanoparticle candidates derived from Rosetta\_design. For clarity, trimeric antigen-bearing  
1148 component is shown in orange and assembly component in blue. (b) Geometric properties of  
1149 different nanoparticle candidates.

1150

1151 **Supplementary Figure S2. Purification and characterization of different antigen-presenting**  
1152 **components and assembled nanoparticles.** (a) SEC curves of BG505-SOSIP.v5.2(7S) and

1153 BG505-SOSIP-fused nanoparticle components. (b) SDS PAGE analysis of the purified assembly  
1154 component for T33\_dn2, T33\_dn10 and I53\_dn5 nanoparticle systems. (c) SEC purification of  
1155 different nanoparticle candidates after assembly. (d) SDS PAGE gel of the purified nanoparticles  
1156 confirming the presence of both, antigen-bearing and assembly components.

1157

1158 **Supplementary Figure S3. Site specific glycan analysis of BG505-SOSIP-bearing**  
1159 **components and free BG505-SOSIPv5.2(7S).** The table shows the glycoforms found at each  
1160 potential N-linked glycosylation site (PNGS), compositions corresponding to  
1161 oligomannose/hybrid-type glycans are colored green and fully processed complex type glycans  
1162 are colored magenta. PNGS with no attached glycan are colored grey. Oligomannose-type  
1163 glycans are categorized according to the number of mannose residues present, hybrids are  
1164 categorized according to the presence/absence of fucose and complex-type glycans are  
1165 categorized according to the number of processed antenna and the presence/absence of fucose.  
1166 Sites that could only be obtained from low intensity peptides cannot be distinguished into the  
1167 categories in the table and so are merged to cover all oligomannose/hybrid compositions or  
1168 complex-type glycans

1169

1170 **Supplementary Figure S4. Nanoparticle stability studies.** Native PAGE assays were used for  
1171 evaluation of nanoparticle integrity following the incubation under the specified conditions.

1172

1173 **Supplementary Figure S5. Cryo-EM analysis of BG505-SOSIP-T33\_dn10 nanoparticle.**  
1174 Schematic representation of the data processing workflow with relevant statistics.

1175

1176 **Supplementary Figure S6. Cryo-EM analysis of BG505-SOSIP-I53\_dn5 nanoparticle.**

1177 Schematic representation of the data processing workflow with relevant statistics.

1178

1179 **Supplementary Figure S7. ConM-SOSIP-T33\_dn2 nanoparticle purification and**

1180 **characterization.** (a) SEC purification of ConM-SOSIP-T33\_dn2A and 2D class-averages from

1181 negative-stain-EM analysis. (b) SEC purification of assembled ConM-SOSIP-T33\_dn2 and NS-

1182 EM analysis of the purified nanoparticles (raw micrograph and 2D class averages). (c) SPR-based

1183 characterization of the antigenicity of purified nanoparticles. ConM-SOSIP.v7 trimer was used as

1184 a reference. In addition to affinity, SPR signal is also a function of antigen size (molecular weight).

1185 MW of the ConM-SOSIP-T33\_dn2 nanoparticle is ~5.1 times higher than that of soluble ConM-

1186 SOSIP.v7 trimer. See methods section for data analysis information.

1187

1188 **Supplementary Figure S8. Extended immunization data.** (a) Anti-nanoparticle core response

1189 (ELISA binding titers) in individual Group 2 animals, with the mean value indicated by the solid

1190 line. The dashed line represents the assay detection limit. (b) Ratios of NAb titers and anti-trimer

1191 binding antibody titers in sera from individual animals in Group 1 (open circles) and Group 2

1192 (black squares) were calculated at weeks 4, 8 and 22. Scatter plots are shown with mean values

1193 indicated. Red asterisks indicate sera samples where neutralization titers were below the level of

1194 detection (1:20 titer). An AUC statistical analysis of the titer ratio values for Group 1 versus Group

1195 2 as a function of time results in  $p = 0.016$ .

1196

1197 **Supplementary Figure S9. Comparison of ConM-SOSIP.v7 and ConM-SOSIP.v9.** (a)

1198 EMPER data derived using ConM-SOSIP.v7 (top) and ConM-SOSIP.v9 (bottom), complexed

1199 with polyclonal Fab sample isolated from the serum of rabbit r2381 (Grp1) at week 22 time point.  
1200 Representative raw micrographs (left), 2D classes (middle) and 3D classes (right) are shown. Red  
1201 circles mark the 2D classes of ConM-SOSIP.v7 gp120-gp41 monomers bound to one or more  
1202 Fabs. Reconstructed monomer-like 3D classes are shown. Fabs are easily discernable in most 3D  
1203 classes but epitope assignment is very challenging due to high degree of heterogeneity.  
1204 Complexing with ConM-SOSIP.v9 results in significantly lower percentage of disassembled  
1205 trimers (i.e. monomers), which can be observed in 2D and 3D classes. (b) Comparison of  
1206 stabilizing mutations in different ConM-SOSIP constructs.

1207

1208 **Supplementary Figure S10. Extended data for EMPER analysis of antibody responses in**  
1209 **immunized rabbits.** Sample micrograph, 2D class averages and sample 3D reconstructions  
1210 obtained for antibodies isolated from the specified rabbits at (a) week 4 and (b) week 22.

1211
